# A Topological Data Analytic Approach for Discovering Biophysical Signatures in Protein Dynamics

Wai Shing Tang,<sup>1,\*</sup> Gabriel Monteiro da Silva,<sup>2,\*</sup> Henry Kirveslahti,<sup>3</sup> Erin Skeens,<sup>2</sup> Bibo Feng,<sup>4</sup> Timothy Sudijono,<sup>5</sup> Kevin K. Yang,<sup>6</sup> Sayan Mukherjee,<sup>3,7-9</sup> Brenda Rubenstein,<sup>4,#</sup> and Lorin Crawford<sup>6,10,11,#,†</sup>

**1 Department of Physics, Brown University, Providence, RI, USA**

**2 Department of Molecular and Cell Biology, Brown University, Providence, RI, USA**

**3 Department of Statistical Science, Duke University, Durham, NC, USA**

**4 Department of Chemistry, Brown University, Providence, RI, USA**

**5 Department of Statistics, Stanford University, Palo Alto, CA, USA**

**6 Microsoft Research New England, Cambridge, MA, USA**

**7 Department of Computer Science, Duke University, Durham, NC, USA**

**8 Department of Mathematics, Duke University, Durham, NC, USA**

**9 Department of Bioinformatics & Biostatistics, Duke University, Durham, NC, USA**

**10 Department of Biostatistics, Brown University, Providence, RI, USA**

**11 Center for Computational Molecular Biology, Brown University, Providence, RI, USA**

**\* Authors Contributed Equally**

**# Jointly Supervised This Work**

**† Corresponding E-mail: [lcrawford@microsoft.com](mailto:lcrawford@microsoft.com)**

## Abstract

Identifying structural differences among proteins can be a non-trivial task. When contrasting ensembles of protein structures obtained from molecular dynamics simulations, biologically-relevant features can be easily overshadowed by spurious fluctuations. Here, we present SINATRA Pro, a computational pipeline designed to robustly identify topological differences between two sets of protein structures. Algorithmically, SINATRA Pro works by first taking in the 3D atomic coordinates for each protein snapshot and summarizing them according to their underlying topology. Statistically significant topological features are then projected back onto an user-selected representative protein structure, thus facilitating the visual identification of biophysical signatures of different protein ensembles. We assess the ability of SINATRA Pro to detect minute conformational changes in five independent protein systems of varying complexities. In all test cases, SINATRA Pro identifies known structural features that have been validated by previous experimental and computational studies, as well as novel features that are also likely to be biologically-relevant according to the literature. These results highlight SINATRA Pro as a promising method for facilitating the non-trivial task of pattern recognition in trajectories resulting from molecular dynamics simulations, with substantially increased resolution.

## Significance

Structural features of proteins often serve as signatures of their biological function and molecular binding activity. Elucidating these structural features is essential for a full understanding of underlying biophysical mechanisms. While there are existing methods aimed at identifying structural differences between protein variants, such methods do not have the capability to jointly infer both geometric and dynamic changes, simultaneously. In this paper, we propose SINATRA Pro, a computational framework for extracting key structural features between two sets of proteins. SINATRA Pro robustly outperforms standard techniques in pinpointing the physical locations of both static and dynamic signatures across various types of protein ensembles, and it does so with improved resolution.

## 44 Introduction

45 Identifying structural features associated with macromolecular dynamics is crucial to our understanding  
46 of the underlying physical behavior of proteins and their broader impact on biology and health. Structural  
47 and dynamical properties of proteins often serve as signatures of their functions and activities [1]. Subtle  
48 topological changes in protein conformation can lead to dramatic changes in biological function [2,3], thus  
49 highlighting the importance of being able to accurately characterize protein conformational dynamics.

50 Conventionally, the structural dynamics of proteins have been modeled using molecular dynamics  
51 (MD) simulations, which work by sampling structural ensembles from conformational landscapes. In  
52 infinite timescales, such structural ensembles are expected to represent all physical states such that their  
53 ensemble-averaged observables converge to true physical values and are thus physically meaningful. While  
54 MD simulations have provided key insights into the atomistic motions that underpin many protein func-  
55 tions [4], biologically-relevant structural changes can be overshadowed by spurious statistical noise caused  
56 by the thermal fluctuations that naturally arise during the course of these simulations [5]. In practice,  
57 this can often make important structural features difficult to identify and robustly interpret from MD  
58 trajectories. Traditionally, data from MD simulations are analyzed in a strictly goal-dependent manner  
59 by using computational methods that quantify and assess specific protein characteristics. For example,  
60 geometric changes that arise as a result of ligand binding, point mutations, or post-translational modifi-  
61 cations are usually inferred by analyzing the root mean square fluctuations (RMSF) of atomic positions  
62 or the per-domain radius of gyration with respect to a reference structure [6]. Unfortunately, these stan-  
63 dard approaches are less powerful when the relevant changes in protein structure are overshadowed by  
64 fluctuations irrelevant to the biological process of interest.

65 Recently, more sophisticated methods have aimed to overcome these challenges by taking advantage  
66 of correspondences between the atomic positions on any two given proteins. For example, per-residue  
67 distance functions or contact maps can be calculated on each frame of a trajectory for clustering [7] or  
68 principal component analyses (PCA) [8,9], which project complex conformations onto a lower-dimensional  
69 space for ease of comparison. However, the downside to these methods is that they require diffeomor-  
70 phisms between structures (i.e., the map from protein *A* to protein *B* must be differentiable). There are  
71 many scenarios in protein dynamics where no such transformation is guaranteed because atomic features  
72 can be gained or lost during the evolution of the system [10]. Indeed, there are 3D shape algorithms  
73 that construct more general “functional” correspondences and can be applied even across shapes having  
74 different topology [11,12]; however, previous work has shown that the performance of these algorithms  
75 drops significantly when the assumed functional mapping input is even slightly misspecified [13].

76 In this work, we introduce SINATRA Pro: a topological data analytic pipeline for identifying biologically-  
77 relevant structural differences between two protein structural ensembles without the need for explicit con-  
78 tact maps or atomic correspondences. Our algorithm is an extension of a previous framework, SINATRA,  
79 which was broadly introduced to perform variable selection on physical features that best describe the  
80 variation between two groups of static 3D shapes [13]. Using a tool from integral geometry and differential  
81 topology called the Euler characteristic (EC) transform [14–17], SINATRA was shown to have the power  
82 to identify known morphological perturbations in controlled simulations and robustly identify anatomical  
83 aberrations in mandibular molars associated within four different suborders of primates. SINATRA Pro  
84 is an adaptation of the SINATRA framework for protein dynamics. Here, we develop a simplicial complex  
85 construction step to specifically model both 3D geometric and topological relationships between atomic  
86 positions on protein structures. We also utilize a new set of statistical parameters which we calibrate for  
87 complex protein systems.

88 In this study, we demonstrate SINATRA Pro’s ability to identify key structural and dynamical fea-  
89 tures in a hierarchy of proteins with increasingly challenging features to statistically resolve. The five  
90 proteins studied, TEM  $\beta$ -lactamase, tyrosine-protein kinase Abl1, HIV-1 protease, EF-Tu (elongation  
91 factor thermo unstable), and Importin- $\beta$ , undergo structural changes in response to a wide range of well-  
92 studied biological phenomena, including mutations and small molecule binding. We find that SINATRA

93 Pro outperforms standard analytic techniques including RMSF and PCA in consistently pinpointing  
94 physical locations of biologically-relevant conformational changes. Overall, we find that SINATRA Pro  
95 holds great promise for extracting topological differences between two sets of protein structures from  
96 meaningless statistical noise.

## 97 Results

### 98 Pipeline Overview

99 The SINATRA Pro pipeline involves five key steps (see Fig. 1). First, the algorithm begins by taking  
100 aligned structures from two protein MD simulation trajectories of different phenotypic states (e.g., wild-  
101 type versus mutant) as inputs (Fig. 1(a)). In the second step, SINATRA Pro uses the atomic positions  
102 of each protein to create mesh representations of their 3D structures (Fig. 1(b)). Here, atoms within  
103 a predetermined physical distance cutoff (e.g.,  $\sim 6$  Ångströms (Å) apart) are connected by “edges” and  
104 then triangles enclosed by the connected edges are filled to create “faces”. In the third step, we convert  
105 the resulting triangulated meshes to a set of topological summary statistics using an invariant called  
106 the “differential Euler Characteristics (DEC)” transform (Fig. 1(c)). In the fourth step, SINATRA Pro  
107 implements a nonlinear Gaussian process model to classify the protein structures using the topological  
108 summary statistics, with which association measures are computed for each topological feature to provide  
109 a statistical notion of “significance” (Fig. 1(d)). In the last step of the pipeline, SINATRA Pro maps  
110 the association measures back onto the original protein structures (Fig. 1(e)), which produces “evidence  
111 scores” that reveal the spatial locations that best explain the variance between two protein ensembles.  
112 Theoretical details of our implementation are fully detailed in the Materials and Methods sections.

### 113 Software Overview

114 The software for SINATRA Pro requires the following inputs: (i) 3D Cartesian coordinates correspond-  
115 ing to the atomic positions in each protein structure; (ii)  $\mathbf{y}$ , a binary vector denoting protein class or  
116 phenotype (e.g.,  $y_i = 0$  for wild-type or  $y_i = 1$  for mutant); (iii)  $r$ , the cutoff distance for simplicial  
117 construction (i.e., constructing the mesh representation for every protein); (iv)  $c$ , the number of cones  
118 of directions; (v)  $d$ , the number of directions within each cone; (vi)  $\theta$ , the cap radius used to generate  
119 directions in a cone; and (vii)  $l$ , the number of sublevel sets (i.e., filtration steps) used to compute the  
120 differential Euler characteristic (DEC) curve along any given direction. Results for controlled simulations  
121 were done using free parameters  $\{r = 1.0 \text{ \AA}, c = 20, d = 8, \theta = 0.80, l = 120\}$ , and results for real data  
122 analyses were done using parameters  $\{r = 6.0 \text{ \AA}, c = 20, d = 8, \theta = 0.80, l = 120\}$ . All values were chosen  
123 via a grid search. Guidelines for how to choose the free parameters for the software are given in Table 1.  
124 Tables detailing the scalability of the current algorithmic implementation of SINATRA Pro can also be  
125 found in Supporting Information (see Tables S1-S3).

### 126 Performance of SINATRA Pro on Benchmark Simulations

127 We implemented a controlled simulation study designed to assess SINATRA Pro’s performance at iden-  
128 tifying structurally-perturbed regions in protein dynamics relative to other methods. Here, the premise  
129 behind “controlled simulations” is that topological artifacts (i.e., perturbations of atomic positions in a  
130 certain region) are manually introduced to a set of protein structures to establish a ground truth and sta-  
131 tistically evaluate the concept of power. The original and perturbed structures represent two phenotypic  
132 classes and are fed into SINATRA Pro to assess whether it can reliably identify the perturbed regions of  
133 interest.

134 To generate data for these controlled simulations, we use real structural data of wild-type  $\beta$ -lactamase  
135 (TEM), an enzyme widely implicated in microbial resistance that has evolved numerous mutations of

136 clinical relevance. In the first phenotypic group (set  $A$ ), original structures are drawn at 1 nanosecond  
137 (ns) intervals over a 100 ns MD trajectory (e.g.,  $t_{\text{MD}} = [0, 1, 2, 3, \dots, 99]$  ns +  $\delta$ , where  $\delta$  is a time offset  
138 parameter). Next, a comparable set of perturbed structures (set  $B$ ) are drawn at 1 ns intervals but  
139 shifted by 0.5 ns with respect to the set  $A$  structures (e.g.,  $t_{\text{MD}} = [0.5, 1.5, 2.5, 3.5, \dots, 99.5]$  ns +  $\delta$ ) to  
140 allow for thermal noise to be introduced. Here, we displace the atomic positions of each atom in the  
141  $\Omega$ -loop (i.e., the region of interest or ROI) in each perturbed structure within set  $B$  by

- 142 • a constant Cartesian vector set to (i) 0.5 Å, (ii) 1.0 Å, and (iii) 2.0 Å in each  $(x, y, z)$  direction;
- 143 • a spherically uniform random vector where each  $(x, y, z)$  direction is first drawn from a standard  
144 Gaussian distribution  $\mathcal{N}(0, 1)$  and then the vector is normalized to be of length (iv) 0.5 Å, (v) 1.0  
145 Å, and (vi) 2.0 Å.

146 These simple, artificial control cases are designed to represent two different forms of structural changes  
147 that can happen within protein dynamics. Namely, scenarios (i)-(iii) involve a displacement of atoms by  
148 a constant amount in a constant direction, which emulates a static structural change; while, scenarios  
149 (iv)-(vi) displace the atoms by a constant amount in a (spherically uniform) random direction, which  
150 emulates a dynamic or stochastic structural change. Altogether, we use datasets of  $N = 1000$  protein  
151 structures per simulation scenario: 100 ns intervals  $\times$  5 different choices of  $\delta = \{0.0, 0.1, 0.2, 0.3, 0.4\}$   
152 ns  $\times$  2 phenotypic classes (wild-type versus perturbed). We evaluate all competing methods' abilities  
153 to correctly identify perturbed atoms located within the Omega-loop region (Material and Methods).  
154 Here, we use receiver operating characteristic (ROC) curves that plot true positive rates (TPR) against  
155 false positive rates (FPR) (Fig. 2). This is further quantified by assessing the area under the curve  
156 (AUC). The results presented in the main text reflect using SINATRA Pro with parameters set to  
157  $\{r = 1.0 \text{ \AA}, c = 20, d = 8, \theta = 0.80, l = 120\}$  chosen via a grid search. Note that additional figures  
158 assessing how robust SINATRA Pro is to different free parameter value settings can be found in the  
159 Supporting Information (see sensitivity analysis in Fig. S1).

160 **Overview of Competing Baselines.** In this section, we compare SINATRA Pro to four competing  
161 approaches: root mean square fluctuation (RMSF) calculations, principal component analysis (PCA),  
162 Elastic Net classification, and Neural Network classification. The first baseline is RMSF which computes  
163  $\sqrt{\|\mathbf{x} - \langle \mathbf{x} \rangle\|^2}$ , where  $\mathbf{x} = (x, y, z)$  denotes the positions of the protein's alpha-carbons (which we denote  
164 in shorthand by  $C_\alpha$ ) for each frame and  $\langle \mathbf{x} \rangle$  is the average position of that corresponding atom over  
165 the entire MD simulation. The difference in the RMSF values between the original and perturbed  
166 structures is taken as the score for feature selection. The second baseline performs PCA (based on singular  
167 value decomposition) over the Cartesian  $(x, y, z)$ -coordinates for the  $C_\alpha$  atoms using `scikit-learn` [18],  
168 which reduces the sample space into 10 principal components. We sum the components (weighed by  
169 their singular values) for the original wild-type and perturbed data separately, and then determine the  
170 magnitudes of the change in the component sum between the the two protein classes as the score for  
171 feature selection. The last two baselines concatenate the coordinates of all atoms within each protein and  
172 treats them as features in a dataframe. The Elastic Net uses a regularized linear classification model via  
173 stochastic gradient descent in `scikit-learn` to assign sparse individual coefficients to each coordinate of  
174 every  $C_\alpha$  atom, where the free regularization parameter is chosen with 90% training and 10% validation  
175 set splits. We assess the power of the Elastic Net by taking the sum of the coefficient values corresponding  
176 to each atomic position. The Neural Network uses the following architecture with Rectified Linear Unit  
177 (ReLU) nonlinear activation functions [19]: (1) an input layer of Cartesian coordinates of all of the atoms;  
178 (2) a hidden layer with  $H = 2048$  neurons; (3) a second hidden layer with  $H = 512$  neurons; (4) a third  
179 hidden layer with  $H = 128$  neurons; and (5) an outer layer with a single node which uses a sigmoid  
180 link function for protein classification. Batch Normalization was implemented between each layer and a  
181 normalized saliency map to rank the importance of each atom [20]. The simplest saliency map attributes  
182 the partial derivatives  $\partial y_i / \partial \mathbf{x}_{i,j}$  as the importance of the coordinates for the  $j$ -th atom in the  $i$ -th protein



183 structure; here,  $y_i$  denotes the neural network output after the sigmoid link function for the  $i$ -th protein  
184 structure. We then assign global importance to each atom by  $\sum_{i=1}^{N_c} |\partial y_i / \partial \mathbf{x}_{ij}| / N_c$ , where  $N_c$  denotes the  
185 number of protein structures in a given class. For the Neural Network, we assess power by taking the  
186 sum of the saliency map values corresponding to each atomic position.

187 It is important to note that, while SINATRA Pro is implemented over the entire protein structure,  
188 the four baselines that we consider are limited to only assessing structural differences between  $C_\alpha$  atoms.  
189 The main reason for this is that atomic features can be gained or lost due to mutations or phylogenetic  
190 variations that introduce heterogeneity in protein sequences, thus creating a lack of a one-to-one corre-  
191 spondence between any two given 3D structures. Without this explicit mapping between structures, none  
192 of the four coordinate-based competing approaches are able to be fully implemented as they all rely on  
193 (in some way or another) equal dimensionality across all proteins. We instead run these baselines on just  
194 the  $C_\alpha$  atoms because the  $C_\alpha$  atoms are located at the center “anchoring” position of each residue (i.e.,  
195 the center of an amino acid unit) and their correspondences are conserved over side-chain substitutions.  
196 Therefore, when assessing MD trajectories, the  $C_\alpha$  atoms represent consistent “landmarks” that summa-  
197 rize the global geometry of the protein structure. Ultimately, we recognize that these method comparisons  
198 with SINATRA Pro are not equivalent; however, they do highlight a key and practical advantage of the  
199 topological data analytic approach used in SINATRA Pro which maintains its utility even when such  
200 atom-by-atom correspondences between protein structures are not available.

201 **Method Comparisons.** The overall performance of each competing method to identify is dependent on  
202 two factors: (1) whether the structural changes are reproduced by static or stochastic conformations, and  
203 (2) the underlying statistical assumptions of the methods. For example, RMSF had the most difficulty  
204 identifying constant displacements in the protein structures (Figs. 2(a)-(c)). In these scenarios, RMSF  
205 was effectively a random classifier with an average AUC  $\approx 0.5$  and diagonal ROC curves showing no  
206 signal detected. These results are explained by that fact that RMSF effectively measures how much each  
207 atomic coordinate  $\mathbf{x}$  deviates from the average atomic position in the ensemble  $\langle \mathbf{x} \rangle$ . When conformations  
208 are constantly shifted,  $\mathbf{x}$  and  $\langle \mathbf{x} \rangle$  are scaled by the same factor and, as a result, their differences remain  
209 unchanged. Therefore, static structural changes are essentially undetectable by RMSF. On the other  
210 hand, RMSF is perfectly well suited for stochastic structural changes because, when atomic displacements  
211 are caused by a random spherical vector, the scaling factors between each  $\mathbf{x}$  and  $\langle \mathbf{x} \rangle$  are noticeably  
212 different (AUC  $\geq 0.89$  in Figs. 2(d)-(f)). Note that PCA follows a similar trend, but with much less  
213 power likely due to the fact that we only consider the top 10 PCs for these analyses.

214 A slightly different intuition can be followed when looking at the results for the Elastic Net and Neural  
215 Network classifiers. When atomic positions are shifted equally by a constant Cartesian vector, the atoms  
216 in the ROI for the perturbed proteins become (in some cases) completely separable from those in the  
217 original structures. Therefore, an Elastic Net and Neural Network have no trouble assigning the true  
218 causal atoms non-zero effect sizes (AUC  $\geq 0.85$  for both approaches in Figs. 2(a)-(c)). This observation is  
219 similar to previous works which show coordinate-based regularization to be most effective when variation  
220 between 3D structures occurs on a global scale and in the same direction on the unit sphere [13]. In the  
221 cases of random spherical perturbations, the variance of the distribution of atoms in the ROI widens;  
222 hence, the Elastic Net and Neural Network have a more difficult time identifying features that differentiate  
223 two protein classes, unless those variations happen on a global scale (again see Figs. 2(d)-(f)).

224 Most notably, SINATRA Pro performs consistently well in all simulation scenarios, identifying both  
225 static and dynamic differences better than most of the competing baselines that we considered (AUC  $\geq$   
226 0.96 in Fig. 2). Although SINATRA Pro is not as adept as the Elastic Net (AUC = 1.00 in Figs. 2(a)-(c))  
227 at detecting static changes, it is able to robustly select significant features that are ignored by RMSF.  
228 In addition, SINATRA Pro is much better than the Elastic Net and Neural Network at identifying  
229 significant spherical perturbations that arise dynamically between protein structures. We hypothesize  
230 that summarizing atomic positions with Euler statistics is what enables SINATRA Pro to robustly capture

231 both varying topology and geometry, unlike its coordinate-based counterparts, regardless of whether those  
232 differences occur in a constant or stochastic way.

## 233 Detecting Conformational Changes in Real Protein Systems

234 To examine SINATRA Pro’s ability to identify known structural changes of biological significance in  
235 real data, we consider the following five protein systems (Table 2): (1) the wild-type and Arg164Ser  
236 mutant of TEM  $\beta$ -lactamase; (2) the wild-type and Ile50Val mutant of HIV-1 protease; (3) the guano-  
237 sine triphosphate (GTP) and guanosine diphosphate (GDP) bound states of EF-Tu; (4) the wild-type  
238 and Met290Ala mutant of Abl1 tyrosine protein kinase; and (5) unbound and IBB-bound importin- $\beta$ .  
239 We choose to analyze these particular systems because they undergo varying degrees of conformational  
240 changes that have been well studied in the literature (again see Table 2). Here, we will treat these previ-  
241 ously identified features as ROIs, where the assumed “difficulty” for SINATRA Pro to statistically resolve  
242 structural signatures will be based on the stochasticity observed within each protein system. Namely,  
243 it will be more difficult to perform feature selection on structural ensembles that are highly dynamic as  
244 spurious fluctuations can interfere with detecting signal from the ROI. For each protein system, SINA-  
245 TRA Pro is implemented on ten different replicates of structures drawn from the same MD trajectory  
246 to affirm the consistency of the results. Atomic enrichments are illustrated in Figs. S2-S3, while residue-  
247 level structural enrichments are shown in Figs. 3-5 and S4-S12, respectively. To quantitatively assess  
248 the probability that SINATRA Pro is identifying any given ROI by chance, we implement a null region  
249 hypothesis test to estimate a  $P$ -value and an approximate Bayes factor (BF) corresponding to our power  
250 to reliably and robustly select certain features (Material and Methods). Reported results for the  $P$ -values  
251 and BF calculations are based on all simulated structures and can be found in Table 3. For comparison,  
252 we again implement the RMSF (Figs. 3-5, S6, S9, and S11-S12) and Elastic Net (Figs. S4-S5, S7-S8, and  
253 S10) baselines on the  $C_{\alpha}$  atoms within these same protein systems. Here, we use scatter plots to illustrate  
254 the correlation between how each of these methods and SINATRA Pro rank the variable importance of  
255 the  $C_{\alpha}$  atoms. All results presented in the main text reflect using SINATRA Pro with parameters set  
256 to  $\{r = 6.0 \text{ \AA}, c = 20, d = 8, \theta = 0.80, l = 120\}$  chosen via a grid search. Note that additional figures  
257 assessing how robust SINATRA Pro is to different configurations of protein meshes for these data (i.e.,  
258 different radius cutoffs  $r$  values) can be found in the Supporting Information (Figs. S13-S17).

## 259 Conformational Changes in the Active Site and Regulatory $\Omega$ -Loop of Arg164Ser 260 TEM $\beta$ -lactamase

261 Previous studies suggest that the Arg164Ser mutation in  $\beta$ -lactamase (TEM) induces structural changes  
262 in a highly plastic region known as the  $\Omega$ -loop (residues 163-178), which plays a major role in the  
263 regulation of enzymatic activity [21, 22]. In wild-type  $\beta$ -lactamase, Arg164 makes a salt bridge with  
264 Asp179 that “pins down” the  $\Omega$ -loop. Mutating Arg164 to serine breaks this salt bridge and disrupts a  
265 vast network of electrostatic and hydrogen interactions, dramatically affecting the dynamical behavior of  
266 the area surrounding the loop, parts of the active site, and potentially other protein domains [23]. These  
267 dynamical rearrangements confer multi-drug resistance to bacteria expressing TEM Arg164Ser, allowing  
268 them to hydrolyze a large number of cephalosporins such as ceftazidime, cefixime, and cefazolin, in lieu  
269 of hydrolyzing ampicillin [24]. Given the enormous burden of multiresistant bacteria on public health,  
270 it is important that we understand the molecular mechanisms behind the structural rearrangements  
271 responsible for the transition to the cephalosporinase phenotype in order to orient future antibiotic  
272 design. Although previous studies have probed these rearrangements with varying approaches [23], the  
273 full mechanism remains elusive, highlighting the need for novel sampling and analytical methods that can  
274 detect the very slight changes in TEM’s active site topology that lead to drug resistance in the Arg164Ser  
275 and similar mutants. To help bridge this gap in understanding, we ran all-atom MD simulations of  
276 unbound TEM-1 and its Arg164Ser mutant, generated by homology modeling, and analyzed the results

277 using SINATRA Pro, RMSF, and the Elastic Net baselines. Here, we expect SINATRA Pro to reveal new  
278 insights about the molecular mechanisms underlying the specificity shift precipitated by the Arg164Ser  
279 mutation, due its ability to detect both minute static and stochastic changes in topology that elude  
280 traditional methods.

281 We compare the MD trajectories of wild-type and mutant TEM using aligned structures of the whole  
282 protein (Figs. 3(a) and S2(a)), residues 65-230 (Fig. 3(b) and S2(b)), and residues 65-213 (Fig. 3(c) and  
283 S2(c)). In all three cases, statistical association measures from SINATRA Pro suggest that there are  
284 indeed significant structural changes in the  $\Omega$ -loop (residues 163-178) relative to the rest of the regions  
285 in the protein (Fig. 3(d)), especially on residues 164 and 176-179, which are involved in the electrostatic  
286 interaction networks disrupted by the arginine to serine substitution. This ROI is not as prominently  
287 identified by the RMSF (see scatter plots in Fig. 3(e)-(g)) or the Elastic Net baselines (Fig. S4(b)-(d)).  
288 Alternatively, all three approaches were able to identify the region harboring residues 213-230, which  
289 undergoes a noticeable dynamic shift over the course the MD trajectory. These results are consistent  
290 with our controlled simulations, which showed that the only time that RMSF and the Elastic Net both  
291 exhibit relatively decent power for stochastic changes is when large structural deviations are introduced  
292 (e.g., see power comparisons in Fig. 2(f)).

293 To more thoroughly assess if the Arg164Ser mutation contributes to the detected changes, we removed  
294 the Arg/Ser164 sidechain, as well as the whole residue (backbone and side chain), from our analyses. With  
295 the Arg/Ser164 atoms removed, association metrics of Arg/Ser164 and residues 176-179 diminished, which  
296 implies that signals pertaining to the dynamical contributions from the electrostatic interaction networks  
297 mediated by the side-chains of Arg164 and Glu179 are lost due to the missing topology. However,  
298 enrichment in the  $\Omega$ -loop persisted, affirming that the identified topological differences are not just due  
299 to changes in these atoms. The null region test showed that the  $\Omega$ -loop is indeed a robust significant  
300 structural feature in TEM, with  $P = 5.63 \times 10^{-2}$  and BF = 2.27 when the whole TEM protein is  
301 analyzed (Table 3 with  $r = 6.0 \text{ \AA}$ ),  $P = 6.85 \times 10^{-2}$  and BF = 2.00 when residues 65-230 are analyzed,  
302 and  $P = 7.22 \times 10^{-4}$  and BF = 70.4 when residues 65-213 are analyzed. We hypothesize that the ROI  
303  $P$ -value is larger than the nominal 0.05 level for analyses with the whole structure and residues 65-  
304 230 because movement in the  $\Omega$ -loop occurs jointly with moderate fluctuations in the region harboring  
305 residues 210-230. Overall, when we limit our scope to just residues 65-213, the region test robustly rejects  
306 the null hypothesis of the  $\Omega$ -loop being identified by chance.

307 Our results are particularly interesting for the TEM  $\beta$ -lactamase example because they highlight the  
308 importance of codon positions 164 and 179 in controlling  $\Omega$ -loop dynamics, which contributes to mod-  
309 ulating activity. Moreover, SINATRA Pro correctly captures the topological effects of the disruption of  
310 the electrostatic network formed by Arg164, Arg178, and Asp179 due to the Arg164Ser mutation. In  
311 addition to reaffirming previously observed phenomena, SINATRA Pro also identified meaningful shifts  
312 in the 210-230 segment in response to the resistance-granting Arg164Ser mutation. This suggests that the  
313 topology of the 210-230 segment, which forms the upper boundaries of the active site, is tightly correlated  
314 with shifts in the  $\Omega$ -loop. Our results suggest an additional potential mechanism for activity modula-  
315 tion by  $\Omega$ -loop fluctuations, where topological changes propagate from regulatory loops to parts of the  
316 active site, suggesting potential allosteric couplings between the  $\Omega$ -loop and the 210-230 segment. These  
317 results function as a testament to SINATRA Pro's capacity for distinguishing meaningful topological  
318 differences from the random fluctuations introduced by disorder-inducing mutations such as Arg164Ser,  
319 which obfuscates traditional analyses pipelines.

## 320 **Changes in the Flap Region of HIV-1 Protease Driven by the Ile50Val Muta-** 321 **tion**

322 Our next analysis focuses on the HIV-1 protease, an enzyme that is essential for viral reproduction and is  
323 a well-established target for controlling HIV infections [25]. *In vivo*, the protease cleaves the HIV polypro-

teins Gag and Gag-Pol at multiple sites, creating the mature protein components of an HIV virion [26]. Over the past 25 years, ten HIV protease inhibitors have been approved for human use by the Food and Drug Administration (FDA), with many more undergoing clinical trials [27]. Similar to TEM, point mutations in the protease gene lead to products that are considerably less susceptible to inhibition by current drugs, generating drug-resistant HIV variants that pose a considerable risk [28]. Many hypotheses have been proposed for the molecular mechanisms underlying the most common resistance-granting mutations, and recent studies have used sophisticated geometric analyses to classify conformational ensembles of mutant structures based on their influences on the dynamics [29]. Structurally, the HIV protease forms a homodimer with highly ordered domains [30]. Most resistance-granting mutations, such as the Ile50Val substitution, are thought to mainly affect the cross-correlated fluctuations of the flaps (residues 47-55), imparting minute changes to the fulcrum and lateral topology [29, 31, 32]. These findings suggest that mutations such as Ile50Val effectively rewire residue communication networks, allowing the enzyme to function even in the presence of the would-be inhibitor. These structural rearrangements lead to surprisingly nuanced changes to the topology, which as discussed previously, require refined quantitative methods to be detected. To test SINATRA Pro's performance in detecting these small changes, we ran all-atom molecular dynamics simulations of "protein and ligand complex in water" systems containing HIV Protease or its Ile50Val mutant complexed with the antiviral drug Amprenavir [33]. We then followed that with analysis using either SINATRA Pro, RMSF, or the Elastic Net, with the objective of measuring each routine's capacity for detecting and reporting the topological changes induced by the mutation.

Even though MD simulations are performed on the protein's native dimeric form, chains A and B were separately selected and aligned before being input into each statistical method to avoid alignment bias due to inter-chain orientation. This focuses SINATRA, RMSF, and the Elastic Net on identifying the structural differences within each chain (e.g., Figs. 4(a)-(b) and S2(d)-(e)). Overall, our analyses reveal that chains A and B seem to respond asymmetrically to the backbone effects of the mutation within the timeframe of the simulations (Table 3). This is not unexpected, as during the course of the simulations, the inhibitor Amprenavir affects dynamics asymmetrically by interacting more significantly with residues of Chain A. The change in RMSF for most of the residues in the flap are shown to be greater than 0.2 Å for chain A and smaller than 0.2 Å for chain B, indicating that the flap became more dynamic in the MD simulations when the Ile50Val mutation was introduced into chain A (Figs. 4(d)-(e) and S11(b)). Meanwhile, the Elastic Net shows larger nonzero coefficients in the fulcrum for chain A than in chain B (Fig. S5(a)).

While association metrics from SINATRA Pro identify structural changes in the flap for both chains (Fig. 4(c)), they also capture the geometric shifts within the fulcrum for chain A. We hypothesize that the coexistence of the two changes (flap and fulcrum) in chain A contributes to a smaller peak (i.e., a weaker signal) in the association metrics produced by SINATRA Pro in the flap for chain A than in chain B. This asymmetry is confirmed by the null test, as topological changes in the flap appear to be less statistically significant in chain A ( $P = 2.95 \times 10^{-1}$  and  $BF = 1.022$ ) than in chain B ( $P = 8.14 \times 10^{-4}$  and  $BF = 63.554$ ) for this MD simulation data. Similar to  $\beta$ -lactamase, we assess if the Ile50Val mutation contributes to these detected topological changes. Upon removing the Ile/Val50 side-chain, the signal observed by SINATRA Pro in the flap drops with the missing topology, but still displays a significant peak relative to the rest of the protein, which implies that the change in association scores is not solely due to the structural differences upon introducing the Ile50Val mutation (Fig. 4(c)). Although SINATRA Pro clearly identified the effects of the isoleucine to valine substitution in flap topology and fulcrum dynamics, SINATRA Pro did not detect other previously elucidated structural signatures of the mutation, such as lateral extension [29]. As the baseline approaches also failed to identify these features, it is likely that their absence stems from sampling limitations inherent to the brute-force and relatively short production dynamics used to generate the conformational datasets.

The HIV protease system presents a welcome test case for SINATRA Pro due to its relative structural

373 simplicity and the symmetry of the dimer. Encouragingly, SINATRA Pro’s results closely match those  
374 observed in previous studies that sought to characterize deltas in the backbone dynamics of the HIV  
375 protease in response to resistance-granting mutations [29].

## 376 **Domain 2 in EF-Tu Undergoes Structural Changes upon GTP Hydrolysis**

377 In our third analysis, we focus on EF-Tu (elongation factor thermo unstable), which is a G-protein that  
378 is responsible for catalyzing the binding of aminoacyl-tRNAs to the ribosome in prokaryotes. After  
379 binding GTP and a given aa-tRNA, EF-Tu strongly interacts with the ribosomal A site [34]. Following  
380 productive aa-tRNA binding, EF-Tu is released upon GTP hydrolysis [35]. The resultant GDP molecule  
381 is exchanged for GTP with EF-Ts (elongation factor thermo stable), allowing elongation to continue.  
382 Structurally, EF-Tu is composed of a Ras-like catalytic domain (RasD), common to G-proteins, and two  
383 beta-barrel domains (D2 and D3) [36]. Previous studies probing dynamic fluctuations of GTPases have  
384 identified that, after hydrolysis (in the GDP-bound state), EF-Tu shows considerably increased flexibility  
385 of backbone atoms belonging to Domains 2 and 3, which are downstream of the nucleotide binding  
386 site in RasD [37]. These fluctuations are thought to be correlated with conformational rearrangements  
387 required for the exchange of GDP for GTP [37]. The conformational rearrangements are thought to occur  
388 on multiple millisecond timescales [37], presenting an obstacle for their study using all-atom molecular  
389 dynamics simulations. While the full relaxations associated with the change in ligand chemistry are  
390 challenging to sample effectively, the initial motions that lead to them can presumably be detected on  
391 much shorter timescales, offering a more viable path for probing.

392 To compare our method’s performance to that of alternative techniques (Figs. S6-S7), we run SINA-  
393 TRA Pro, RMSF, and the Elastic Net on the whole structure (Figs. S2(f) and S6(a)) and fragment  
394 windows limited to residues 208-308 (Figs. S2(g) and S6(b)) and 311-405 (Figs. S2(h) and S6(c)). Note  
395 that all figures displaying the enrichment of structural features are projected onto the GTP-bound struc-  
396 tures. The evidence scores from SINATRA Pro reveal significant structural changes at Domain 2, with  
397 minimal structural changes in the majority of the Ras-like Domain, which agrees with findings in previ-  
398 ous studies [37]. The null region test shows that Domain 2 is indeed an important structural feature in  
399 EF-Tu identified by SINATRA Pro with  $P = 9.30 \times 10^{-4}$  and BF = 56.657, which robustly rejects the  
400 null hypothesis of the ROI being identified by chance (Table 3).

401 The chemical changes associated with the substitution of GTP with GDP in the EF-Tu system are  
402 thought to have significant impacts on backbone topology, making this a particularly interesting use case  
403 for SINATRA Pro. Despite the challenges associated with the considerable noise inherent to the complex  
404 EF-Tu system, SINATRA Pro succeeded in identifying the meaningful topological deltas that are thought  
405 to be important for function and that were elucidated in previous studies.

## 406 **N-pocket Enlargement and $\alpha$ C Helix Displacement in Met290Ala Abl1**

407 Protein tyrosine kinases (TKs) such as Abl1 and Src play significant roles in eukaryotic life, as phospho-  
408 rylation of tyrosine residues in key proteins act as on/off switches that regulate a plethora of cellular  
409 processes and allow for efficient message passing [38]. Deregulation of the activity of these enzymes due  
410 to mutations is usually associated with severe forms of cancer and other chronic diseases, posing a grave  
411 public health problem [39]. Due to their physiological importance, the enzymatic activity of tyrosine  
412 kinases is tightly regulated by a series of structural elements that fluctuate among metastable conforma-  
413 tions between the active and inactive states [40]. This highly dynamic behavior has been exploited for  
414 the development of TK inhibitors, such as the widely-known anticancer drug Imatinib, which exclusively  
415 targets the “DFG out” state of Abl1 [40–42]. In this conformation, the phenylalanine residue of the region  
416 known as the DFG motif (comprised of Asp381, Phe382, and Gly383) occupies Abl1’s ATP binding site,  
417 preventing substrate binding and inactivating the enzyme [43]. Other TK inhibitors such as Dasatinib  
418 are capable of binding to Abl1’s “DFG-in” conformation, in which the positions of the aspartic acid and



419 phenylalanine side-chains are inverted with respect to their positions in DFG-out conformations, acti-  
420 vating the enzyme (i.e., making it capable of productive phosphorylation) [42]. The transition from the  
421 DFG-in to the DFG-out state is thought to happen on the multi-millisecond timescale, which presents  
422 a challenge for capturing it with unbiased atomistic MD simulations [43]. As a workaround, previous  
423 studies have used an engineered Abl1 mutant, Met290Ala, in which the energy barrier for the DFG flip  
424 is considerably reduced, as the steric effect presented by the bulky methionine is removed [2]. Although  
425 the sampling of the entire DFG flip is out of the scope of this work, we hypothesize that the Met290Ala  
426 mutation should induce minute topological changes around the DFG motif even in shorter simulations.  
427 To test this hypothesis and further measure our method’s capacity for detecting localized topological  
428 changes, we ran molecular dynamics simulations on the TK domain of the unbound state of Abl1 and  
429 its Met290Ala mutant. Specifically, we run SINATRA Pro, RMSF, and the Elastic Net on the whole  
430 structure (Figs. 5(a) and S3(a)), fragments limited to residues 242-502 (Figs. 5(b) and S3(b)), and the  
431 N-lobe spanning residues 242-315 (Figs. 5(c) and S3(c)).

432 Since we only simulated the kinase domain of Abl1, both the N-terminal and C-terminal domains  
433 are shown to be highly dynamic as they are no longer stabilized by the mass of the entire protein. As a  
434 result, whole structural changes are overshadowed by large and noisy fluctuations, and competing methods  
435 (Elastic Net and RMSF) have a difficult time identifying enrichment in the DFG motif (Figs. S8(a) and  
436 S12(a)). Nonetheless, SINATRA Pro is able to identify the enrichment in the DFG motif regardless of the  
437 inclusion or exclusion of the N- and C-terminal (Figs. 5). The signal in the DFG motif ROI becomes better  
438 statistically resolved when we remove some of the structural noise and concentrate on regions spanning  
439 residue fragments 242-502 and 242-315 (i.e., the N-lobe). The null region test results for SINATRA  
440 Pro show that the DFG motif is indeed an important structural feature in Abl1:  $P = 8.86 \times 10^{-3}$  and  
441  $BF = 8.783$  for the whole structure analysis (i.e., including the termini) and  $P = 2.50 \times 10^{-4}$  and  $BF = 178$   
442 for the analysis on residues 242-502 (i.e., excluding the termini), both of which reject the null hypothesis  
443 of the ROI being identified by chance (Table 3). In these analyses, the structural differences around the  
444 DFG motif between unbound Abl1 and its Met290Ala mutant were large enough for both RMSF and  
445 the Elastic Net to have power. As a comparison, SINATRA Pro not only robustly identifies residues  
446 associated with the greater N-pocket cleft as being statistically significant (i.e., the DFG motif), but also  
447 the  $\alpha C$  helix spanning residues 281-293 as a moderately enriched region (Fig. 5).

448 From the SINATRA Pro output, we can postulate hypotheses regarding the involvement of specific  
449 codon positions outside of the DFG motif in the concerted motions that culminate in the flip, such as  
450 the two peaks of signal surrounding it (residues 350-360 and 390-400). These interesting results show  
451 that even short simulations can prove useful for gaining mechanistic insights regarding long-timescale  
452 macromolecular relaxations, as long as the heuristics employed to analyze the resulting trajectories are  
453 capable of detecting the often minute signals associated with these topological shifts.

## 454 **Opening of Superhelix Differentiates Unbound and IBB-bound Importin- $\beta$**

455 Our last analysis focused on the karyopherin Importin- $\beta$ , an essential member of the nuclear import  
456 complex in eukaryotes, as it mediates the transportation of cargo from the cytosol to the nucleus [44].  
457 Molecular recognition by Importin- $\beta$  often requires the cooperative binding of molecular adaptors that  
458 recognize and bind to nuclear localization sequences (NLS)—structural motifs present in cargo destined  
459 for the nucleus [44]. Structurally, Importin- $\beta$  is organized as a superhelix composed of up to 20 tandem  
460 HEAT repeats, each of which contain two antiparallel alpha helices linked by a turn [45]. This highly or-  
461 dered structure is further stabilized by interactions with Importin- $\beta$ -binding (IBB) domains of transport  
462 adaptors such Importin- $\alpha$  or Snurportin 1, which attach very strongly to Importin- $\beta$  [46]. The release  
463 of IBB peptides after successful transport across the nuclear pore leads to large structural rearrange-  
464 ments and fluctuations that are propagated across most of Importin- $\beta$ ’s backbone [47]. Although not  
465 difficult to detect with traditional analysis pipelines, such as calculating per-residue root-mean-square  
466 fluctuations or the backbone’s radius of gyration, the pseudo-global nature of these rearrangements is

467 diametrically opposite to most of the previously explored examples, presenting an important test for  
468 SINATRA Pro. Considering this, we ran MD simulations of unbound and IBB-bound Importin- $\beta$  and, as  
469 with the previous examples, analyzed the resulting trajectories with SINATRA Pro to compare against  
470 standard methods. The structural features identified are projected onto the IBB-bound form (Figs. S3(d)  
471 and S9(a)). Association metrics from SINATRA Pro, RMSF, and the Elastic Net all indicate large-scale  
472 conformational changes occur upon IBB release that involve the majority of the importin- $\beta$  structure  
473 (Figs. S9(b)-(c) and S10).

474 Since Importin- $\beta$  functions as a molecular spring due to its supercoiled structure and extensive in-  
475 teractions with targets for transport, the sudden removal of the bound IBB domain to generate the  
476 unbound structure leads to extensive and drastic fluctuations across most of the backbone during pro-  
477 duction dynamics, originating from multiple highly-correlated nodes in each HEAT repeat. These drastic  
478 rearrangements translate to significant deltas in the topology and per-residue fluctuations that are readily  
479 detected by all tested methods. Importantly, the SINATRA Pro output replicates the expected results  
480 for the IBB bound/unbound Importin- $\beta$  system, demonstrating the method's capacity for picking up  
481 relevant structural determinants not only for localized changes, but also for backbone-wide large-scale  
482 fluctuations.

## 483 Discussion

484 In this paper, we introduced SINATRA Pro: a topological data analytic approach designed to extract  
485 biologically-relevant structural differences between two protein ensembles. Through an extensive bench-  
486 mark simulation study, we assessed the utility and statistical properties of SINATRA Pro against com-  
487 monly used methods in the field. Here, we showed that our proposed framework can robustly identify both  
488 static and dynamic structural changes that occur between protein ensembles. We also highlighted that,  
489 unlike other standard approaches in the field, SINATRA Pro does not require atom-by-atom correspon-  
490 dences between structures and thus can be implemented using all atomic information that is available,  
491 rather than being limited to atomic features that are conserved over side-chain substitutions. With real  
492 MD data, we used SINATRA Pro to analyze five different protein systems and demonstrated its ability to  
493 identify known regions of interest that have been validated by previous experimental and computational  
494 studies, as well as reveal novel structural features that are also likely to be biologically-relevant according  
495 to evidence in the literature. Overall, these results show the promise of SINATRA Pro as a hypothesis  
496 generation tool that practitioners can use to design more informed experiments for answering downstream  
497 scientific questions (e.g., whether a mutation or chemical change “induces” a specific structural change).

498 There are many potential extensions to the SINATRA Pro pipeline. First, in its current form, SINA-  
499 TRA Pro treats all atomic features as being equally important *a priori* to the phenotype of interest.  
500 One particularly interesting extension of the method would be to up- or down-weight the contributions  
501 of different types of atomic features (e.g., carbons, hydrogens, or oxygens) or residues (e.g., serine versus  
502 arginine) to more accurately represent the topology of specific inter-atomic connections such as hydrogen  
503 and covalent bonds. In practice, this would require making such annotations and deriving topological  
504 summary statistics of protein structures based on a weighted Euler characteristic transform [48]. Another  
505 natural extension would be to apply the SINATRA Pro pipeline to other data types used to study varia-  
506 tion in 3D protein structures such as cryogenic electron microscopy (cryo-EM) and X-ray crystallography  
507 (i.e., electron density) data. Previous work has already shown that topological characteristics computed  
508 on tumors from magnetic resonance images (MRIs) have the potential to be powerful predictors of sur-  
509 vival times for patients with glioblastoma multiforme (GBM) [17, 48]; however, it has also been noted  
510 that the efficacy of current topological summaries decreases when heterogeneity between two phenotypic  
511 classes is driven by minute differences [13]. For example, cryo-EM images can look quick similar even  
512 for two proteins harboring different mutations. SINATRA Pro's improved ability to capture inter-class  
513 variation is driven by local fluctuations in shape morphology, so it would be interesting to see if our

514 proposed pipeline could offer more resolved insights for these types of applications.

## 515 **URLs**

516 SINATRA Pro software, [https://github.com/lcrawlab/SINATRA\\_Pro](https://github.com/lcrawlab/SINATRA_Pro); Schrödinger Desmond software,  
517 <https://www.schrodinger.com/products/desmond>; GROMACS software, <https://www.gromacs.org>;  
518 Visual Molecular Dynamics (VMD) software, <https://www.ks.uiuc.edu/Research/vmd/>; MDAnal-  
519 ysis software, <https://www.mdanalysis.org>; UCSF Chimera software, [https://www.cgl.ucsf.edu/  
520 chimera/](https://www.cgl.ucsf.edu/chimera/).

## 521 **Acknowledgements**

522 This research was supported in part by an Alfred P. Sloan Research Fellowship and a David & Lucile  
523 Packard Fellowship for Science and Engineering awarded to LC. GM and BR were funded by National  
524 Science Foundation EPSCoR Track-II award number OIA1736253. A majority of this research was  
525 conducted using computational resources and services at the Center for Computation and Visualization  
526 (CCV), Brown University. SM would like to acknowledge partial funding from HFSP RGP005, NSF  
527 DMS 17-13012, NSF BCS 1552848, NSF DBI 1661386, NSF IIS 15-46331, NSF DMS 16-13261, as well  
528 as high-performance computing partially supported by grant 2016-IDG-1013 from the North Carolina  
529 Biotechnology Center. Any opinions, findings, and conclusions or recommendations expressed in this  
530 material are those of the author(s) and do not necessarily reflect the views of any of the funders.

## 531 **Author Contributions**

532 WST and LC conceived the study. WST, HK, TS, SM, and LC developed the theoretical aspects of the  
533 framework. WST developed the software and carried out the statistical analyses. GM, ES, BF, and BR  
534 performed the MD simulations. GM and BR designed the strategy for the protein analysis, conducted  
535 RMSF and normal mode baseline comparisons, provided expertise about the underlying biophysics for  
536 results. WST, TS, KY, and LC conducted Elastic Net and Neural Network baseline comparisons. All  
537 authors wrote and revised the manuscript.

## 538 **Competing Interests**

539 The authors declare no competing interests.

## 540 Material and Methods

### 541 Molecular Dynamics Simulations

542 The protein structure data used in the current study are a result of molecular dynamic (MD) simulations.  
543 For large systems (i.e., IBB-bound Importin- $\beta$ , unbound Importin- $\beta$ ) and those containing small-molecule  
544 ligands (i.e., wild-type HIV Protease, Ile50Val HIV protease, GTP-bound EF-Tu, and GDP-bound EF-  
545 Tu), we used Schrödinger's *Desmond* (release 2020-1) [49] to run three independent 100 nanosecond (ns)  
546 simulations for each system. This decision is rooted in *Desmond*'s high performance when dealing with  
547 hundreds of thousands of atoms, and the extensive validation of the small-molecule parameters contained  
548 in the OPLS3e force-field [50]. The systems were built within a dodecahedron box extending 1 nanometer  
549 (nm) beyond the solute in all three dimensions and solvated with water molecules using the SPC model  
550 [51]. Charges were neutralized by replacing a varying number of solvent molecules with sodium and  
551 chloride ions. Before production dynamics, all systems were relaxed and equilibrated with *Desmond*'s  
552 standard relaxation protocol, which first performs energy minimization with 50 kcal/mol/Å<sup>2</sup> restraints  
553 on the protein's heavy atoms, followed by an extensive equilibration protocol. This protocol is detailed  
554 below:

- 555 1. NVT equilibration at 10 K for 12 ps
- 556 2. NPT equilibration at 10 K for 12 ps
- 557 3. NPT equilibration at 300K with harmonic restraints on the protein's heavy atoms for 120 ps
- 558 4. NPT equilibration at 300 K, unrestrained, for 240 ps,

559 where NVT denotes constant temperature and volume and NPT denotes constant temperature and  
560 pressure. After equilibration, unrestrained NPT production simulations were conducted at 300 K and 1  
561 atm for 100 ns for each system, in triplicates. Time steps for all simulations were set to their default  
562 values: 2:2:6 fs (bonded:near:far).

563 For comparatively small systems without ligands (i.e., wild-type TEM, Arg164Ser TEM, wild-type  
564 Abl1, and Met290Val Abl1), we used *GROMACS* (release 2018-2) [52] to run three independent 100 ns  
565 simulations for each system (150 ns for Abl1). Simulations were conducted with a 2 fs time step using  
566 the Amberff14SB force-field [53] and the TIP3P water model [51]. As with the *Desmond* simulations, the  
567 systems were built within a dodecahedron box and charges neutralized by replacing a number of solvent  
568 atoms with sodium and chloride ions. For each system, energy was minimized using a steepest-descent  
569 algorithm until the maximum force on any given atom was less than 1000 kJ/mol/min. Solvent atoms were  
570 equilibrated in sequential 0.5 ns NVT and NPT simulations with solute heavy atoms restrained by a spring  
571 constant of 1,000 kJ/mol/nm<sup>2</sup> using the LINCS algorithm [54]. After equilibration, production dynamics  
572 were conducted sans the position restraints. All simulations were conducted at 300 K and 1 atm. Lastly,  
573 using *Visual Molecular Dynamics (VMD)* (version 1.9.3) [55], we converted all trajectories employed  
574 in this study to a DCD file format and stripped solvent atoms to facilitate downstream computational  
575 analyses.

### 576 Protein Structure Alignment

577 In the current study, protein structures are aligned by minimizing the root-mean-square distance (RMSD)  
578 between the atoms on their backbone alpha-carbons (which we denote in shorthand by  $C_{\alpha}$ ). The first  
579 frame of the MD simulation is chosen as the reference structure. Next, all other frames (i.e., the mobile and  
580 fluctuating structures) in the dataset are aligned to this reference frame by (i) first centering the geometry  
581 of the  $C_{\alpha}$  atoms to the same origin and then (ii) minimizing the RMSD rotation matrix. This calculation  
582 is performed using the *MDAnalysis* software package in *Python* (see Data and Software Availability)

583 [6, 56–58]. For inter-class alignment when comparing protein class  $A$  to class  $B$  (e.g., mutants versus wild-  
584 type), the first frame in the trajectory of class  $B$  is aligned to the first frame in the trajectory of class  $A$   
585 before the remaining frames are aligned. In the controlled simulation experiments, perturbed structures  
586 were obtained by directly modifying the atomic coordinates of the pre-aligned proteins; therefore, the  
587 perturbed structures do not need further alignment since their unperturbed regions remain aligned even  
588 after the controlled modifications.

## 589 Converting Protein Structure Data to 3D Mesh Representations

590 To convert aligned protein structures into a mesh representation, in the first step of the SINATRA Pro  
591 pipeline, we make use of a technique which we refer to as a “simplicial construction” (Fig. 1(b)). In this  
592 procedure, we treat the atomic positions for the protein as vertices on a 3D shape or surface. First, we  
593 draw an edge between any two atoms if their Euclidean distance is smaller than some radius cutoff  $r$ ,  
594 namely  $\text{dist}[(x_1, y_1, z_1), (x_2, y_2, z_2)] < r$ . Next, we fill in all of the triangles (or faces) formed by these  
595 connected edges. The resulting triangulated meshes are then normalized to the unit sphere, which means  
596 that the coordinates for all atoms are scaled with respect to the mesh with the largest radius. We treat the  
597 normalized meshes as simplicial complexes which we then use to compute topological summary statistics.

## 598 Topological Summary Statistics for Protein Mesh Representations

599 Adopted from its predecessor [13], the second step of the SINATRA Pro pipeline uses a tool from integral  
600 geometry and differential topology called the Euler characteristic (EC) transform [14–17]. As a brief  
601 overview of this approach, given the mesh representation  $\mathcal{M}$  of a protein structure, the Euler characteristic  
602 is an accessible topological invariant defined as

$$603 \quad \chi = \#V(\mathcal{M}) - \#E(\mathcal{M}) + \#F(\mathcal{M}), \quad (1)$$

604 where the collection  $\{\#V(\mathcal{M}), \#E(\mathcal{M}), \#F(\mathcal{M})\}$  denotes the number of vertices (atoms), edges (con-  
605 nections between atoms), and faces (triangles enclosed by edges) of the mesh, respectively. An EC curve  
606  $\chi_\nu(\mathcal{M})$  tracks the change in the Euler characteristic with respect to a given filtration of length  $l$  in some  
607 direction  $\nu$ . Theoretically, this is done by first specifying a height function  $h_\nu(\mathbf{x}) = \mathbf{x}^\top \nu$  for some atomic  
608 position  $\mathbf{x} \in \mathcal{M}$  in direction  $\nu$ . This height function is then used to define sublevel sets (or subparts) of  
609 the mesh  $\mathcal{M}_\nu^a$  in direction  $\nu$ , where  $h_\nu(\mathbf{x}) \leq a$ . In practice, the EC curve is  $\chi(\mathcal{M}_\nu^a)$  computed over a range  
610 of  $l$  filtration steps in direction  $\nu$ . The corresponding EC transform is defined as the collection of EC  
611 curves across a set of  $\nu = 1, \dots, m$  directions, and maps onto a 3D protein structure as a concatenated  
612  $J = (l \times m)$ -dimensional feature vector to be used for statistical analyses.

613 In previous studies, it has been observed that the Euler characteristic can be a less-than-optimal shape  
614 summary statistic when inter-class variation between 3D objects is high and driven by local fluctuations  
615 in morphology [13, 16, 17, 59, 60]. Given that this situation can be quite common in molecular dynamics,  
616 we introduce a new topological invariant which we refer to as the differential Euler characteristic (DEC)  
617 (see Fig. 1(c)). As an alternative to Eq. (1), the DEC is computed as the following

$$618 \quad \Delta\chi = \Delta V(\mathcal{M}) - \Delta E(\mathcal{M}) + \Delta F(\mathcal{M}), \quad (2)$$

619 where, for some lag parameter  $t$ , we define  $\Delta V(\mathcal{M}) = \#V_l(\mathcal{M}) - \#V_{l-t}(\mathcal{M})$ ,  $\Delta E(\mathcal{M}) = \#E_l(\mathcal{M}) -$   
620  $\#E_{l-t}(\mathcal{M})$  and  $\Delta F(\mathcal{M}) = \#F_l(\mathcal{M}) - \#F_{l-t}(\mathcal{M})$ . In this study, we set  $t = 1$  such that, intuitively,  
621 the DEC tracks the changes (i.e., the local appearance or disappearance of topological features) in the  
622 number of vertices, edges, and faces from one sublevel set to the next. Much like with the original Euler  
623 characteristic, the DEC curve is  $\Delta\chi(\mathcal{M}_\nu^a)$  computed over a range of  $l$  filtration steps in a given direction  
624  $\nu$  and the DEC transform is similarly defined as the collection of DEC curves across a set of  $\nu = 1, \dots, m$   
625 directions. Overall, for each dataset with  $N$  total proteins, an  $N \times J$  design matrix  $\mathbf{X}$  is statistically



626 analyzed, where the columns denote the differential Euler characteristic computed at a given filtration  
627 step and direction. Each sublevel set value, direction, and set of atomic positions used to compute a DEC  
628 curve are stored by the algorithm for the association mapping and projection phases of the pipeline.

629 **Choosing the Number of Directions and Filtration Steps.** In this paper, we use a series of  
630 simulations and sensitivity analyses to develop an intuition as to how to set the granularity of sublevel  
631 filtrations  $l$  and choose the number of directions  $m$  for real protein structure data (Figs. 1 and S1, and  
632 Table 1). Since the structural changes that a protein class exhibits can occur on both a global and local  
633 scale, depending on its biophysical and chemical properties, we recommend choosing the former parameter  
634  $l$  via cross validation or a grid-based search. For the latter, the SINATRA Pro software defines the total  
635 number of directions  $m$  as the union of  $c$  sets of cones of directions  $\mathcal{D} = \bigcup \mathcal{C}_k(\theta)$ , where each cone  
636  $\mathcal{C}_k(\theta) = \{\nu_{k,1}, \dots, \nu_{k,d} \mid \theta\}$  for  $k = 1, \dots, c$  is parameterized by a cap radius  $\theta$  from which equidistant  
637 vectors are generated over the unit sphere. We use cones because local shape information matters most  
638 when determining reconstructed manifolds and it has been shown that topological invariants that are  
639 measured in directions of close proximity contain similar local information [13, 15, 61, 62]. This naturally  
640 leads to the construction of sets  $\mathcal{C}_k(\theta)$  where the angle  $\theta$  between them is relatively small (again see  
641 Table 1). In general, we use sufficiency results for topological transforms (see Theorem 7.14 in Curry  
642 et al. [15]) to motivate the notion that considering larger numbers of  $m = c \times d$  directions will lead to  
643 a more robust summary of 3D shapes and surfaces. Hence, ideally, one would select an effectively large  
644 number of  $c$  cones (and  $d$  directions within these cones) to ensure that SINATRA Pro is summarizing  
645 all relevant structural information about the variance between phenotypic classes (e.g., mutants versus  
646 wild-type).

## 647 Probabilistic Model for Protein Structure Classification

648 In the third step of the SINATRA Pro pipeline, we use (weight-space) Gaussian process probit regression  
649 model to classify protein structures based on their topological summaries generated by the DEC trans-  
650 formation via Eq. (2). Here, we specify the following probabilistic hierarchical model (Fig. 1(d)) [63–67]

$$651 \quad \mathbf{y} \sim \mathcal{B}(\boldsymbol{\pi}), \quad \mathbf{g}(\boldsymbol{\pi}) = \Phi^{-1}(\boldsymbol{\pi}) = \mathbf{f}, \quad \mathbf{f} \sim \mathcal{N}(\mathbf{0}, \mathbf{K}), \quad (3)$$

652 where  $\mathbf{y}$  is an  $N$ -dimensional vector of Bernoulli distributed phenotypic class labels (e.g., mutants versus  
653 wild-type),  $\boldsymbol{\pi}$  is an  $N$ -dimensional vector representing the underlying probability that a shape is classified  
654 as a “class” (e.g.,  $y = 1$  if “mutant”),  $\mathbf{g}(\cdot)$  is a probit link function with  $\Phi(\cdot)$  the cumulative distribution  
655 function (CDF) of the standard normal distribution, and  $\mathbf{f}$  is an  $N$ -dimensional vector estimated from  
656 the data. We take a classic kernel regression approach [66, 68–70] where we posit that  $\mathbf{f}$  lives within  
657 a reproducing kernel Hilbert space (RKHS) defined by some (nonlinear) covariance function, which im-  
658 plicitly accounts for higher-order interactions between features, leading to more complete classifications  
659 of structural data [71–73]. To this end, we assume  $\mathbf{f}$  is normally distributed with mean vector  $\mathbf{0}$  and  
660 covariance matrix  $\mathbf{K}$  with elements defined by the radial basis function  $\mathbf{K}_{ij} = \exp\{-\vartheta\|\mathbf{x}_i - \mathbf{x}_j\|^2\}$  with  
661 bandwidth  $\vartheta$  set using the “median criterion” approach to maintain numerical stability and avoid ad-  
662 ditional computational costs [74]. Here,  $\mathbf{x}_j$  denotes the  $j$ -th topological feature in  $\mathbf{X}$ . The full model  
663 specified in Equation (3) is commonly referred to as “Gaussian process classification” (GPC).

664 Given the complete specification of the GPC, we use Bayesian inference to draw samples from the pos-  
665 terior distribution of the latent variables, which is proportional to  $p(\mathbf{f} \mid \mathbf{y}) \propto p(\mathbf{y} \mid \mathbf{f}) \times p(\mathbf{f})$ . Here,  $p(\mathbf{y} \mid \mathbf{f})$   
666 denotes the likelihood of the observed binary labels given the functions (i.e., the Bernoulli distribution),  
667 and  $p(\mathbf{f})$  is the prior distribution for the latent variables (i.e., the multivariate normal distribution).  
668 The probit likelihood in Eq. (3) makes it intractable to estimate the posterior distribution  $p(\mathbf{f} \mid \mathbf{y})$  via  
669 a closed-form solution. We instead use a Markov chain Monte Carlo (MCMC) method called “elliptical  
670 slice sampling” to conduct posterior inference (see Data and Software Dependencies) [75].

## 671 Feature Selection of Topological Summary Statistics

672 After implementing the elliptical slice sampling algorithm to estimate the posterior distribution of the  
 673 latent variables  $\mathbf{f}$  in Eq. (3), we define a nonparametric effect size for each topological summary statistic  
 674 via the following standard projection [72, 76]

$$675 \quad \boldsymbol{\beta} = (\mathbf{X}^\top \mathbf{X})^+ \mathbf{X}^\top \mathbf{f}, \quad (4)$$

676 where  $\mathbf{M}^+$  is used to denote the generalized inverse of a matrix  $\mathbf{M}$ , and each element in  $\boldsymbol{\beta}$  details  
 677 the nonlinear relationship between the DEC topological summary statistics and the variance between  
 678 protein structures. In order to determine a statistical rank ordering for these effect sizes, we assign an  
 679 information theoretic-based measure of relative centrality to each  $j$ -th topological feature using Kullback-  
 680 Leibler divergence (KLD) [73]

$$681 \quad \text{KLD}(\beta_j) := \text{KL} [p(\boldsymbol{\beta}_{-j}) \| p(\boldsymbol{\beta}_{-j} | \beta_j = 0)] = \int_{\boldsymbol{\beta}_{-j}} \log \left( \frac{p(\boldsymbol{\beta}_{-j})}{p(\boldsymbol{\beta}_{-j} | \beta_j = 0)} \right) p(\boldsymbol{\beta}_{-j}) d\boldsymbol{\beta}_{-j}. \quad (5)$$

682 for  $j = 1, \dots, J$  topological features. Finally, we normalize to obtain an association metric (Fig. 1(d)),

$$683 \quad \gamma_j = \text{KLD}(\beta_j) / \sum \text{KLD}(\beta_l). \quad (6)$$

684 There are two key takeaways from this scaled formulation. First, the KLD is non-negative, and it equals  
 685 zero if and only if the posterior distribution of  $\boldsymbol{\beta}_{-j}$  is independent of the effect  $\beta_j$ . Intuitively, this is  
 686 equivalent to saying that removing an unimportant topological feature has no impact on explaining the  
 687 variance between different protein structure. Second,  $\boldsymbol{\gamma} = (\gamma_1, \dots, \gamma_J)$  is bounded on the unit interval  
 688  $[0, 1]$  with the natural interpretation of providing relative evidence of association for each DEC statistic  
 689 (where values close to 1 suggest greater importance). From a classical hypothesis testing point-of-view,  
 690 the null hypothesis for Eq. (6) assumes that every DEC feature equally contribute to the total variance  
 691 between proteins, while the alternative hypothesis proposes that some DEC features are better associated  
 692 with biophysical changes in protein structures than others [13, 73].

693 **Closed Form Solution for Atomic-Level Association Measures** For simplicity, we assume that  
 694 the implied posterior distribution of  $\boldsymbol{\beta}$  (deterministically given in Eq. (4)) is approximately multivariate  
 695 normal with an empirical mean vector  $\boldsymbol{\mu}$  and positive semi-definite covariance/precision matrix  $\boldsymbol{\Sigma} = \boldsymbol{\Lambda}^{-1}$   
 696 [13, 73]. Given these values, we iteratively partition such that, for each  $j$ -th topological feature:

$$697 \quad \boldsymbol{\beta} = \begin{pmatrix} \beta_j \\ \boldsymbol{\beta}_{-j} \end{pmatrix}; \quad \boldsymbol{\mu} = \begin{pmatrix} \mu_j \\ \boldsymbol{\mu}_{-j} \end{pmatrix}; \quad \boldsymbol{\Sigma} = \begin{pmatrix} \sigma_j & \boldsymbol{\sigma}_{-j}^\top \\ \boldsymbol{\sigma}_{-j} & \boldsymbol{\Sigma}_{-j} \end{pmatrix}; \quad \boldsymbol{\Lambda} = \begin{pmatrix} \lambda_j & \boldsymbol{\lambda}_{-j}^\top \\ \boldsymbol{\lambda}_{-j} & \boldsymbol{\Lambda}_{-j} \end{pmatrix}. \quad (7)$$

698 Under normality assumptions, Eq. (5) has the following closed form solution

$$699 \quad \text{KLD}(\beta_j) = \frac{1}{2} [-\log |\boldsymbol{\Sigma}_{-j} \boldsymbol{\Lambda}_{-j}| + \text{tr}(\boldsymbol{\Sigma}_{-j} \boldsymbol{\Lambda}_{-j}) + 1 - J + \alpha_j (\beta_j - \mu_j)^2], \quad (8)$$

700 where  $\log |\cdot|$  represents the matrix log-determinant function, and  $\text{tr}(\cdot)$  is the matrix trace function.  
 701 Importantly, the term  $\alpha_j = \boldsymbol{\lambda}_{-j}^\top \boldsymbol{\Lambda}_{-j}^{-1} \boldsymbol{\lambda}_{-j}$  characterizes the linear (and non-negative) rate of change of  
 702 information when the effect of any topological feature is absent from the analysis [73]. By symmetry  
 703 in the notation for elements of the sub-vectors and sub-matrices, we simply permute the order of the  
 704 variables in  $\boldsymbol{\beta}$  and iteratively compute the KLD to measure the centrality of each DEC transform.

705 **Approximate Computation** In practice, we use a few approximations to scale the otherwise compu-  
706 tationally expensive steps in Eq. (8). The first approximation involves computing the log determinant.  
707 With a dataset of reasonably dense meshes, the number of topological features is expected to be large  
708 (i.e.,  $J \gg 0$ ). In this setting, the term  $-\log(|\Sigma_{-j}\Lambda_{-j}|) + \text{tr}(\Sigma_{-j}\Lambda_{-j}) + (1 - p)$  remains relatively equal  
709 for each feature  $j$  and makes a negligible contribution to the entire sum. Thus, we simplify Eq. (8) to

$$710 \text{KLD}(\beta_j) \approx \alpha_j(\beta_j - \mu_j)^2/2. \quad (9)$$

711 This approximation of the KLD still relies on the full precision matrix  $\Lambda$ . For a large number of topological  
712 features  $J$ , this calculation is expensive; however, it is only done once and can be done with efficient  
713 matrix decomposition. The rate of change parameter  $\alpha_j = \lambda_{-j}^T \Lambda_{-j}^{-1} \lambda_{-j}$ , on the other hand, depends on  
714 the partitioned matrix  $\Lambda_{-j}^{-1}$  for every  $j$ -th topological feature. This requires inverting a  $(J - 1) \times (J - 1)$   
715 matrix  $J$  times. Fortunately, we can reduce this computational burden by taking advantage of the fact  
716 that any  $\Lambda_{-j}^{-1}$  is formed by removing the  $j$ -th row and column from the precision matrix  $\Lambda$ . Therefore,  
717 given the partition in Eq. (7), we can use the Sherman-Morrison formula [77] to efficiently approximate  
718 these quantities using the following rank-1 update for each topological feature

$$719 \Omega^{(j)} = \Lambda - \Lambda \sigma_j \sigma_j^T \Lambda / (1 + \sigma_j^T \Lambda \sigma_j) \quad j = 1, \dots, J. \quad (10)$$

720 Here,  $\sigma_j$  is the  $j$ -th column from the posterior covariance matrix  $\Sigma$ , and each  $\Lambda_{-j}^{-1}$  is approximated by  
721 removing the  $j$ -th row and column from  $\Omega^{(j)}$ . Ultimately, this reduces the computational complexity of  
722 Equation (9) to just  $J$ -independent  $O(J^2)$  operations which can be parallelized.

## 723 Reconstruction and Visualization of Biophysical Signatures

724 After obtaining association measures  $\gamma$  for each topological feature computed via Eq. (6), in the fourth  
725 step of the SINATRA Pro pipeline, we map this information back onto the original structures to visualize  
726 topological differences between the protein classes. The main idea is that we want to select or prioritize  
727 atoms that correspond to the topological features with the greatest association measures. To do this,  
728 we perform a criterion-based *reconstruction* algorithm [13]. In each direction, each atom (i.e., vertex)  
729 lies along a filtration step that corresponds to a  $\gamma_j$  value. Therefore, each atom corresponds to  $m =$   
730  $(c \times d)$  values in  $\gamma$ . To perform the reconstruction, we sort the values in  $\gamma$  from smallest to largest and  
731 continuously increase a threshold. If all of the  $\gamma$  values corresponding to an atom are larger than the  
732 threshold, the atom is considered “alive”. As the threshold is increased, when the criterion is no longer  
733 satisfied, the atom is considered “dead” and that minimum value below the threshold (which we will  
734 denote by  $\hat{\gamma}$ ) is assigned the atom as its evidence score. This calculation is repeated for each frame in  
735 the dataset. For atomic-level evidence scores (e.g., Figs. S2 and S3), the  $\hat{\gamma}$  values are ranked among all  
736 atoms and scaled from 0 (lowest) to 100 (highest) to facilitate the visualization and interpretation of  
737 structural and biophysical enrichment. To compute residue-level evidence scores (e.g., Figs. 3-5, S6, and  
738 S9), we take the average of the  $\hat{\gamma}$  values for all atoms within a residue which are then also ranked and  
739 scaled from 0 to 100.

## 740 Performance Assessment for Controlled Simulation Study

741 We demonstrate the power of the SINATRA Pro pipeline for identifying biophysical signatures in protein  
742 dynamics via multiple controlled simulations studies using the sequential procedure:

- 743 1. Fit the Gaussian process classification (GPC) model using elliptical slice sampling and compute  
744 relative centrality association measures  $\gamma_j$  for each  $j$ -th topological feature (i.e., differential Euler  
745 characteristic or DEC per sublevel set filtration). Recall, the total number of features  $J = c \times d \times l$   
746 is a product of (i)  $c$ , the number of cones of directions; (ii)  $d$ , the number of directions within each

747 cone; and (iii)  $l$ , the number of sublevel sets (i.e., steps in the filtration) used to compute the DEC  
748 along a given direction.

749 2. Sort the topological features from largest to smallest according to their association measures  $\gamma_1 \geq$   
750  $\gamma_2 \geq \dots \geq \gamma_p$ .

751 3. By iteratively moving through the sorted measures  $T_k = \gamma_k$  (starting with  $k = 1$ ), we reconstruct  
752 the atoms corresponding to the topological features with  $\{j : \gamma_j \geq T_k\}$ .

753 An atom is “detected” when the sublevel set in which it resides is selected across all of the directions  
754 within a particular cone. We form a union of the set of detected atoms across all cones to construct  
755 the set of reconstructed vertices at a given level  $T_k$ . Using this set of vertices, we compute the true  
756 positive rate (TPR) and false positive rate (FPR) by assessing overlap with the set of truly associated  
757 (i.e., perturbed) atoms used to generate the protein classes:

$$758 \quad \text{TPR} = \frac{\sum \text{TP}}{\sum \text{P}}, \quad \text{FPR} = \frac{\sum \text{FP}}{\sum \text{N}} \quad (11)$$

759 where TP is the number of correctly detected true atoms, P is the total number of causal atoms, TN  
760 stands for the true negatives detected by the SINATRA Pro pipeline, and N stands for the total number  
761 of non-causal atoms. In this manner, we obtain a receiver operating characteristic (ROC) curve for the  
762 simulation studies (see Figs. 2 and S1).

## 763 ROI Null Experiment and Statistical Assessment

764 To statistically assess whether SINATRA Pro is identifying the known regions of interest (ROI) in proteins  
765 by chance (see Table 2), we use a previously developed null-based scoring method [13]. The goal of this  
766 analysis is to estimate the probability of obtaining a result from SINATRA Pro under the assumption that  
767 the null hypothesis  $H_0$  of there being no structural differences between mutant and wild-type proteins  
768 is true. Here, we treat the  $K$  atoms located within each ROI of every mutant protein as a landmark.  
769 We construct a test statistic  $\tau^*$  for each ROI by summing the association metric scores of every atom it  
770 contains. To construct a “null” distribution and assess the strength of any score  $\tau^*$ , we randomly select  $T$   
771 “seed” atoms across the mesh outside the ROI for each mutant protein and uniformly generate  $T$ -“null”  
772 regions that are also  $K$ -atoms wide. We then compute similar (null) scores  $\tau_1, \dots, \tau_T$  for each randomly  
773 generated region. A “ $P$ -value”-like quantity (for the  $i$ -th mutant protein) is then generated by:

$$774 \quad P_i = \frac{1}{T+1} \sum_{t=1}^T \mathbb{I}(\tau_i^* \leq \tau_t), \quad i = 1, \dots, N \quad (12)$$

775 where  $\mathbb{I}(\cdot)$  is an indicator function, and a smaller  $P_i$  means more confidence in either method’s ability to  
776 find the desired paraconid landmark. To ensure the robustness of this analysis, we generate the  $N$ -random  
777 null regions using a  $K$ -nearest neighbors (KNN) algorithm on each of the  $T$ -random seed vertices [78].  
778 We also use a calibration formula to transform each  $P$ -value to an approximate Bayes factor (BF) [79],  
779 which is defined as the ratio of the marginal likelihood under the alternative hypothesis  $H_1$  (i.e., that  
780 there is indeed a structural difference between phenotypic classes) versus the null hypothesis  $H_0$ :

$$781 \quad \text{BF}(P_i)_{10} = [-e P_i \log(P_i)]^{-1}, \quad i = 1, \dots, N \quad (13)$$

782 for  $P_i < 1/e$  and  $\text{BF}(P_i)_{10}$  is an estimate of  $\Pr(H_1 | \mathcal{M})/\Pr(H_0 | \mathcal{M})$ , where  $\mathcal{M}$  is again used to denote  
783 the protein meshes. We take the median of the  $P_i$  and  $\text{BF}(P_i)_{10}$  values in Eqs. (12) and (13) across all  
784 mutant proteins, respectively, and report them in Table 3.

## 785 Data and Software Dependencies

786 Code for implementing the SINATRA Pro pipeline is freely available at [https://github.com/lcrawlab/](https://github.com/lcrawlab/SINATRA_Pro)  
787 `SINATRA_Pro`, and is written in Python (version 3.6.9). As part of this procedure: (i) inference for the  
788 Gaussian process classification (GPC) model is based on an elliptical slice sampling algorithm adapted  
789 from the R package `FastGP` (version 1.2) [80] and (ii) the computation of nonlinear effect sizes and as-  
790 sociation measures for the differentiated Euler characteristic (DEC) curves was done by adapting the  
791 “RelATive cEntrality (RATE)” source code originally written in R (version 1.0.0; [https://github.com/](https://github.com/lorinanthony/RATE)  
792 `lorinanthony/RATE`) [73]. Visualizing the reconstructed protein regions outputted by SINATRA Pro was  
793 done using the extensive molecular modeling system software `Chimera` (version 1.14) [81]. Molecular dy-  
794 namic simulations were performed using Schrödinger’s `Desmond` (release 2020-1) [49] and `GROMACS` (release  
795 2018-2) [52]. Furthermore, preprocessing steps for the protein structures resulting from MD simulations  
796 examined in the study were performed using `Visual Molecular Dynamics (VMD)` (version 1.9.3) [55] and  
797 the Python library `MDAnalysis` (version 1.1.1) [6,56–58]. Data generated from the MD simulations can be  
798 downloaded at [https://www.dropbox.com/sh/14fj3paagyrrpu2f/AAA65\\_NbNaX5IU1lrazScZo9a?dl=0](https://www.dropbox.com/sh/14fj3paagyrrpu2f/AAA65_NbNaX5IU1lrazScZo9a?dl=0).



799 **Figures and Tables**

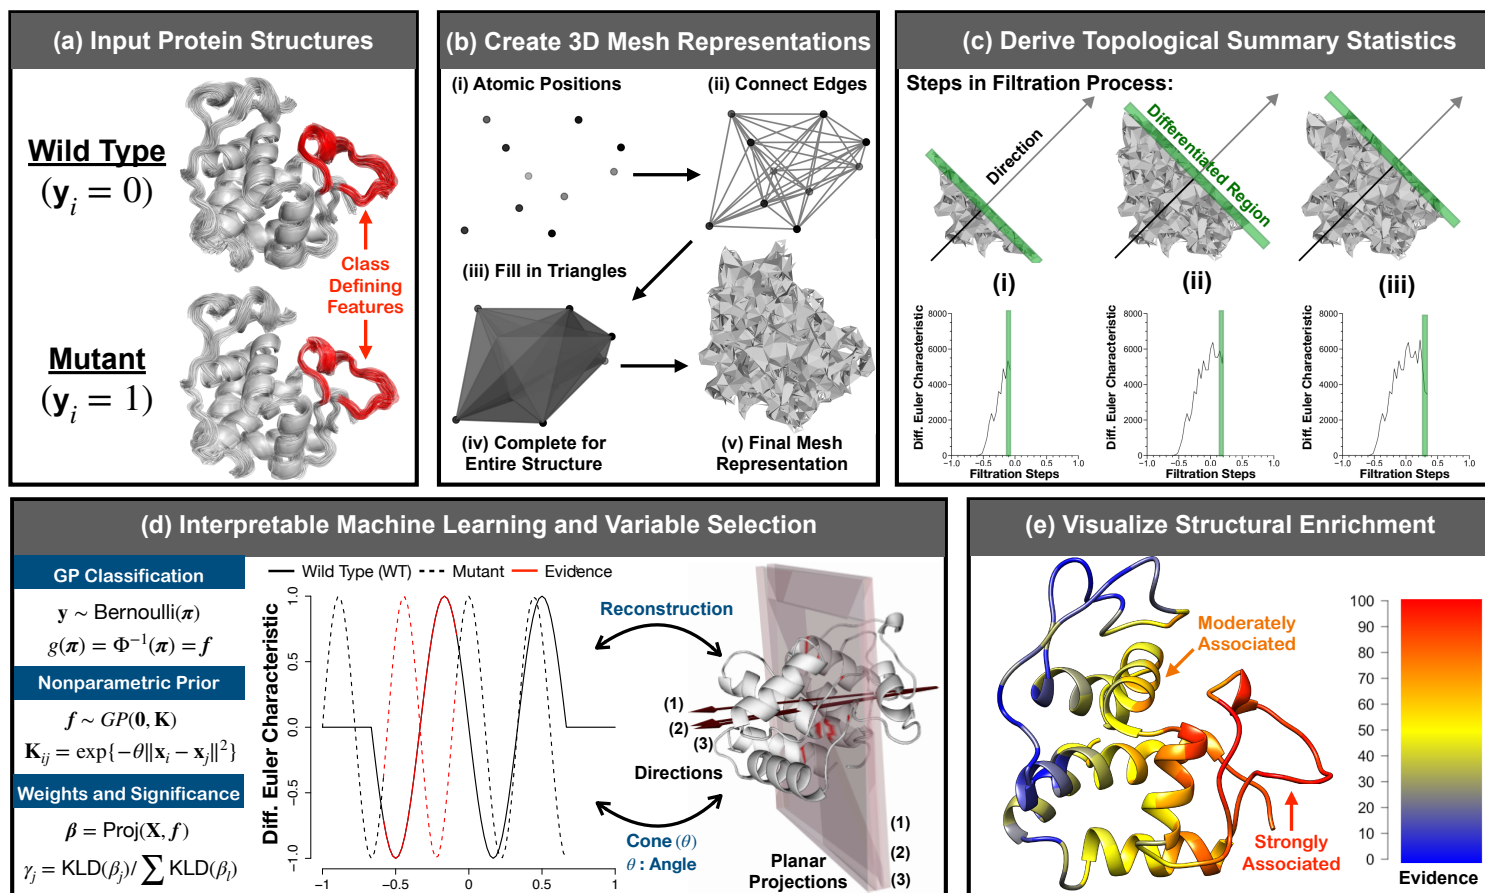

**Figure 1. Schematic overview of SINATRA Pro: a novel framework for discovering biophysical signatures that differentiate classes of proteins.** (a) The SINATRA Pro algorithm requires the following inputs: (i)  $(x, y, z)$ -coordinates corresponding to the structural position of each atom in every protein; (ii)  $\mathbf{y}$ , a binary vector denoting protein class or phenotype (e.g., mutant versus wild-type); (iii)  $r$ , the cutoff distance for simplicial construction (i.e., constructing the mesh representation for every protein); (iv)  $c$ , the number of cones of directions; (v)  $d$ , the number of directions within each cone; (vi)  $\theta$ , the cap radius used to generate directions in a cone; and (vii)  $l$ , the number of sublevel sets (i.e., filtration steps) used to compute the differential Euler characteristic (DEC) curve along a given direction. Guidelines for how to choose the free parameters are given in Table 1. (b) Using the atomic positions for each protein, we create mesh representations of their 3D structures. First, we draw an edge between any two atoms if the Euclidean distance between them is smaller than some value  $r$ , namely  $\text{dist}[(x_1, y_1, z_1), (x_2, y_2, z_2)] < r$ . Next, we fill in all of the triangles (or faces) formed by these connected edges. We treat the resulting triangulated mesh as a simplicial complex with which we can perform topological data analysis. (c) We select initial positions uniformly on a unit sphere. Then for each position, we generate a cone of  $d$  directions within angle  $\theta$  using Rodrigues’ rotation formula [82], resulting in a total of  $m = c \times d$  directions. For each direction, we compute DEC curves with  $l$  sublevel sets. We concatenate the DEC curves along all the directions for each protein to form vectors of topological features of length  $J = l \times m$ . Thus, for a study with  $N$ -proteins, an  $N \times J$  design matrix is statistically analyzed using a Gaussian process classification model. (d) Evidence of association measures for each topological feature vector are determined using relative centrality measures. We reconstruct corresponding protein structures by identifying the atoms on the shape that correspond to “statistically associated” topological features. (e) The reconstruction enables us to visualize the enrichment of biophysical signatures that best explain the variance between the two classes of proteins. The heatmaps display atomic (or residue-level, which we define as a collection of atoms) evidence potential on a scale from  $[0 - 100]$ , with a score of 100 meaning most enriched.

| Free Parameters in SINATRA Pro Software |                                                              |               |                                                                                                                            |
|-----------------------------------------|--------------------------------------------------------------|---------------|----------------------------------------------------------------------------------------------------------------------------|
| Notation                                | Description                                                  | Range         | General Guidelines                                                                                                         |
| $r$                                     | Radius cutoff ( $\text{\AA}$ ) for simplicial reconstruction | $[0, \infty)$ | Use smaller $r \leq 2.0 \text{\AA}$ for rigid proteins and $r \in [2.0 \text{\AA}, 6.0 \text{\AA}]$ for flexible proteins. |
| $c$                                     | Number of cones of directions                                | $[1, \infty)$ | Set much greater than 1 as more power is generally achieved by taking filtrations over multiple directions                 |
| $d$                                     | Number of directions per cone                                | $[1, \infty)$ | Set much greater than 1 as more power is generally achieved by taking filtrations over multiple directions                 |
| $\theta$                                | Cap radius used to generate directions within a cone         | $(0, 2\pi]$   | Set between $[0.1, 0.8]$ since cones should be defined by directions in close proximity                                    |
| $l$                                     | Number of sublevel sets (filtration steps)                   | $[1, \infty)$ | Optimal choice depends on the size of protein molecule being analyzed so use grid search                                   |

**Table 1. General guidelines for choosing values for the free parameters in the SINATRA Pro pipeline software.** The guidelines provided are based off of intuition gained through the simulation studies provided in the main text and Supporting Information. In practice, we suggest specifying multiple cones  $c > 1$  and utilizing multiple directions  $d$  per cone (see monotonically increasing power in Fig. S1 in Supporting Information). While the other two parameters ( $\theta$  and  $l$ ) do not have monotonic properties, their effects on SINATRA’s performance still have natural interpretations. Selection of  $\theta \in [0.1, 0.8]$  supports previous theoretical results that cones should be defined by directions in close proximity to each other [13, 15]; but not so close that they explain the same local information with little variation. Note that our sensitivity analyses suggest that the power of SINATRA Pro is relatively robust to the choice of  $\theta$ . Optimal choice of  $l$  depends on the size of the protein molecules that are being analyzed. Intuitively, for rigid proteins, coarse filtrations with too few sublevel sets cause SINATRA Pro to miss or “step over” structural shifts that occur locally during the course of a molecular dynamic (MD) trajectory. In practice, we recommend choosing the angle between directions within cones  $\theta$  and the number of sublevel sets  $l$  via cross validation or some grid-based search.

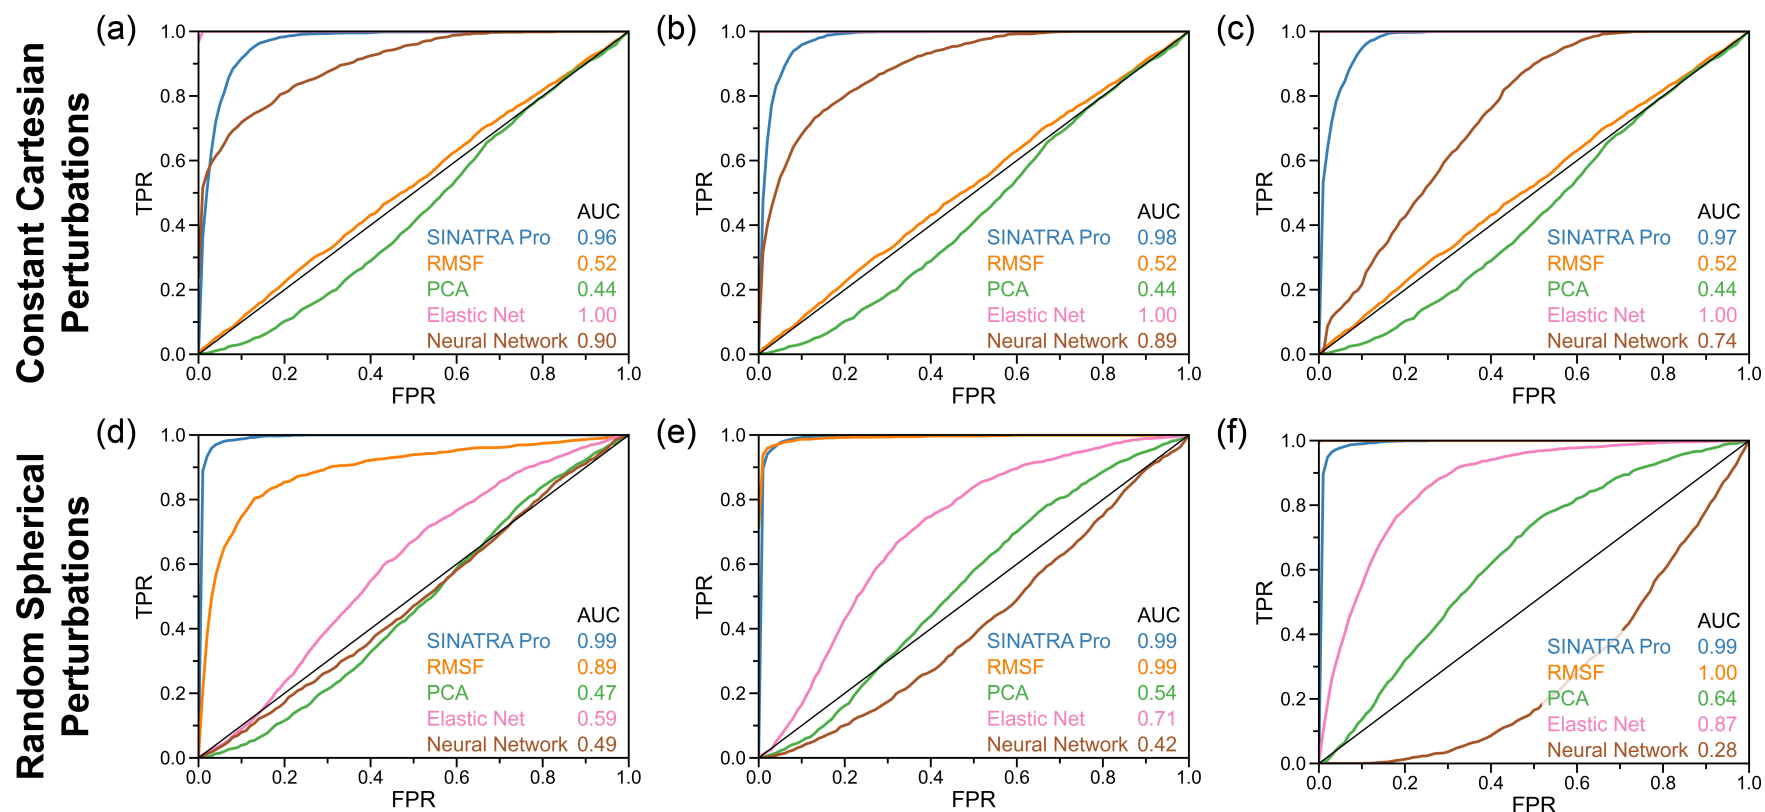

**Figure 2. Receiver operating characteristic (ROC) curves comparing the power and robustness of SINATRA Pro to competing 3D mapping approaches in controlled molecular dynamic (MD) simulations.** To generate data for these simulations, we consider two phenotypic classes using the real structural data of wild-type  $\beta$ -lactamase (TEM). In the first phenotypic class, structural protein data are drawn from equally spaced intervals over a 100 ns MD trajectory (e.g.,  $t_{\text{MD}} = [0, 1, 2, 3, \dots, 99]$  ns +  $\delta$ , where  $\delta$  is a time offset parameter). In the second phenotypic class, proteins are drawn at 1 ns intervals shifted 0.5 ns with respect to the first set (e.g.,  $t_{\text{MD}} = [0.5, 1.5, 2.5, 3.5, \dots, 99.5]$  ns +  $\delta$ ) to introduce thermal noise, and then we displace the atomic positions of each atom in the  $\Omega$ -loop region by (**top row**) a constant Cartesian vector of (**a**) 0.5 Ångströms (Å), (**b**) 1.0 Å, and (**c**) 2.0 Å, or (**bottom row**) by a spherically uniform random vector of (**d**) 0.5 Å, (**e**) 1.0 Å, and (**f**) 2.0 Å. Altogether, we have a dataset of  $N = 1000$  proteins per simulation scenario: 100 ns interval  $\times$  5 different choices  $\delta = \{0.0, 0.1, 0.2, 0.3, 0.4\}$  ns  $\times$  2 phenotypic classes (original wild-type versus perturbed). The ROC curves and corresponding area under the curves (AUC) depict the ability of SINATRA Pro to identify “true class defining” atoms located within the  $\Omega$ -loop region using parameters  $\{r = 1.0 \text{ \AA}, c = 20, d = 8, \theta = 0.80, l = 120\}$  chosen via a grid search. We compare SINATRA Pro to four methods: root mean square fluctuation (RMSF) (orange); principal component analysis (PCA) (green); Elastic Net classification (pink); and a Neural Network (brown). For details on these approaches, see Materials and Methods.

| Protein                  | PDB ID | Chemical Change | Structural Signature                                               | Difficulty | Ref(s)         |
|--------------------------|--------|-----------------|--------------------------------------------------------------------|------------|----------------|
| $\beta$ -lactamase (TEM) | 1BTL   | Arg164Ser       | Increased dynamics of $\Omega$ -Loop (Residues 163-178)            | Easy       | [21, 22]       |
| HIV-1 Protease           | 3NU3   | Ile50Val        | Reduced stability in the flaps (Residues 47-55)                    | Medium     | [29, 31, 32]   |
| EF-Tu                    | 1TTT   | GTP Hydrolysis  | Increased flexibility of Domain 2 (Residues 208-308)               | Easy       | [37, 83, 84]   |
| Abl1                     | 3KFA   | Met290Ala       | Fluctuations in the DFG motif and displacement of helix $\alpha$ C | Hard       | [2, 43, 85-87] |
| Importin- $\beta$        | 2P8Q   | IBB Release     | Uncoiling in the conformation of the superhelix                    | Hard       | [45-47]        |

**Table 2. Detailed overview of the different protein systems analyzed in this study.** The columns of this table are arranged as follows: (1) the name of each protein studied; (2) the corresponding Protein Data Bank (PDB) ID for each molecule [88]; (3) the known chemical change or mutation type that is considered; (4) the specific structural signatures that are known to be associated with each chemical change or mutation type; (5) the presumed difficulty level for SINATRA Pro to detect each structural signature based on the homogeneity in shape variation between the wild-type and mutant proteins; and (6) references that have previously suggested some level of association or enrichment between each structural change and the mutation of interest.

| Protein | ROI            | Fragment | $r = 2 \text{ \AA}$                     |               | $r = 4 \text{ \AA}$                     |                | $r = 6 \text{ \AA}$                     |                |
|---------|----------------|----------|-----------------------------------------|---------------|-----------------------------------------|----------------|-----------------------------------------|----------------|
|         |                |          | $P$ -value                              | Bayes Factor  | $P$ -value                              | Bayes Factor   | $P$ -value                              | Bayes Factor   |
| TEM     | $\Omega$ -Loop | Whole    | $5.95 \times 10^{-1}$                   | —             | <b><math>3.35 \times 10^{-4}</math></b> | <b>137.121</b> | $5.63 \times 10^{-2}$                   | 2.270          |
|         |                | 65-230   | $1.20 \times 10^{-1}$                   | 1.447         | <b><math>4.16 \times 10^{-2}</math></b> | <b>2.783</b>   | $6.85 \times 10^{-2}$                   | 2.004          |
|         |                | 65-213   | <b><math>7.22 \times 10^{-4}</math></b> | <b>70.438</b> | <b><math>7.22 \times 10^{-4}</math></b> | <b>70.438</b>  | <b><math>7.22 \times 10^{-4}</math></b> | <b>70.438</b>  |
| HIV-1   | Flap           | Chain A  | $2.33 \times 10^{-1}$                   | 1.084         | <b><math>4.03 \times 10^{-2}</math></b> | <b>2.841</b>   | $2.95 \times 10^{-1}$                   | 1.022          |
|         |                | Chain B  | <b><math>8.14 \times 10^{-4}</math></b> | <b>63.554</b> | <b><math>8.14 \times 10^{-4}</math></b> | <b>63.554</b>  | <b><math>8.14 \times 10^{-4}</math></b> | <b>63.554</b>  |
| EF-Tu   | Domain 2       | Whole    | <b><math>9.30 \times 10^{-4}</math></b> | <b>56.657</b> | <b><math>9.30 \times 10^{-4}</math></b> | <b>56.657</b>  | <b><math>9.30 \times 10^{-4}</math></b> | <b>56.657</b>  |
| Abl1    | DFG Motif      | Whole    | $1.94 \times 10^{-1}$                   | 1.157         | $5.38 \times 10^{-1}$                   | —              | <b><math>8.86 \times 10^{-3}</math></b> | <b>8.783</b>   |
|         |                | 242-502  | $1.54 \times 10^{-1}$                   | 1.279         | <b><math>2.50 \times 10^{-4}</math></b> | <b>177.614</b> | <b><math>2.50 \times 10^{-4}</math></b> | <b>177.614</b> |

**Table 3. Null hypothesis experiment to evaluate SINATRA Pro’s ability to find regions of interest (ROI) in each of the proteins analyzed in this study.** Here, we assess how likely it is that SINATRA Pro finds the region of interest (ROI) by chance. These ROIs include: (i) the  $\Omega$ -loop (residues 163-178) in TEM; (ii) the flap region (residues 47-55) in HIV-1 protease; (iii) Domain 2 (residues 208-308) in EF-Tu; and (iv) the DFG motif (residues 381-383) in Abl1. Note that protein structures were only analyzed if they contained an entire ROI. For example, in the context of Importin- $\beta$ , the superhelix includes the entire structure and so we do not conduct a null analysis. In this experiment, to produce the results above, we generate “null” regions on each protein using a  $K$ -nearest neighbors (KNN) algorithm on different atoms as random seeds [78], and exclude any generated regions that overlap with the ROI. Next, for each region, we sum the association metrics of all its atoms. We compare how many times the aggregate scores for the ROI are higher than those for the null regions. These “ $P$ -values,” and their corresponding calibrated Bayes factors (BF) when the computed  $P < 1/e$ , are provided above. Note that  $P$ -values less than the nominal size 0.05 and BFs greater than 2.456 are in bold. Results above are based on SINATRA Pro using parameters  $\{c = 20, d = 8, \theta = 0.80, l = 120\}$  while varying the radius cutoff parameter  $r$  for mesh construction on each protein structure.



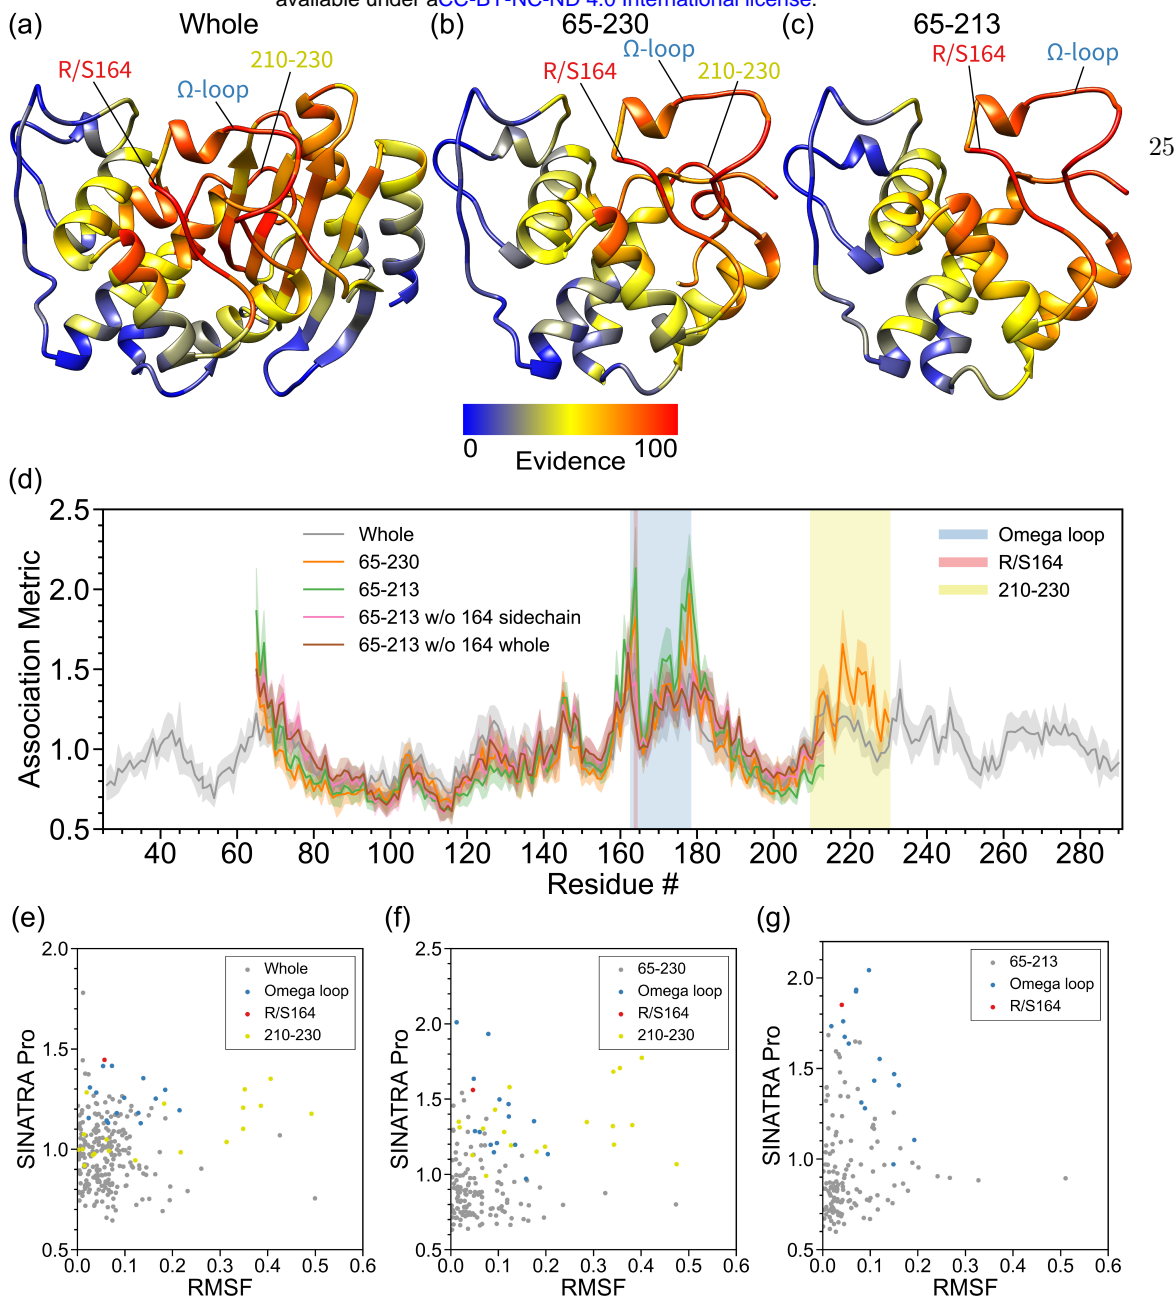

**Figure 3. Real data analyses aimed at detecting structural changes in the  $\Omega$ -loop of  $\beta$ -lactamase (TEM) induced by an R164S mutation.** In this analysis, we compare the molecular dynamic (MD) trajectories of wild-type  $\beta$ -lactamase (TEM) versus R164S mutants [21, 22]. For both phenotypic classes, structural data are drawn from equally spaced intervals over a 100 ns MD trajectory (e.g.,  $t_{MD} = [0, 1, 2, 3, \dots, 99]$  ns +  $\delta$ , where  $\delta$  is a time offset parameter). Altogether, we have a final dataset of  $N = 2000$  protein structures in the study: 100 ns long interval  $\times$  10 different choices  $\delta = \{0.0, 0.1, 0.2, \dots, 0.9\}$  ns  $\times$  2 phenotypic classes (wild-type versus mutant). This figure depicts results after applying SINATRA Pro using parameters  $\{r = 6.0 \text{ \AA}, c = 20, d = 8, \theta = 0.80, l = 120\}$  chosen via a grid search. The heatmaps in panels (a)-(c) highlight residue evidence potential on a scale from [0–100]. A maximum of 100 represents the threshold at which the first residue of the protein is reconstructed, while 0 denotes the threshold when the last residue is reconstructed. Panel (a) shows the residue-level evidence potential when applying SINATRA Pro to the whole protein, while panels (b) and (c) illustrate results when strictly applying the SINATRA Pro pipeline to atoms in residues 65-230 and 65-213, respectively. Annotated regions of interest are color coded and correspond to the shaded residue windows in panel (d). Panel (d) shows the mean association metrics (and their corresponding standard errors) computed for each residue within each analysis (see Material and Methods). Here, the overlap shows the robustness of SINATRA Pro to identify the same signal even when it does not have access to the full structure of the protein. The final row plots the correlation between the SINATRA Pro association metrics and the root mean square fluctuation (RMSF) for the backbone  $C_\alpha$  atoms in the (e) whole protein, (f) fragment 65-230, and (g) fragment 65-213.

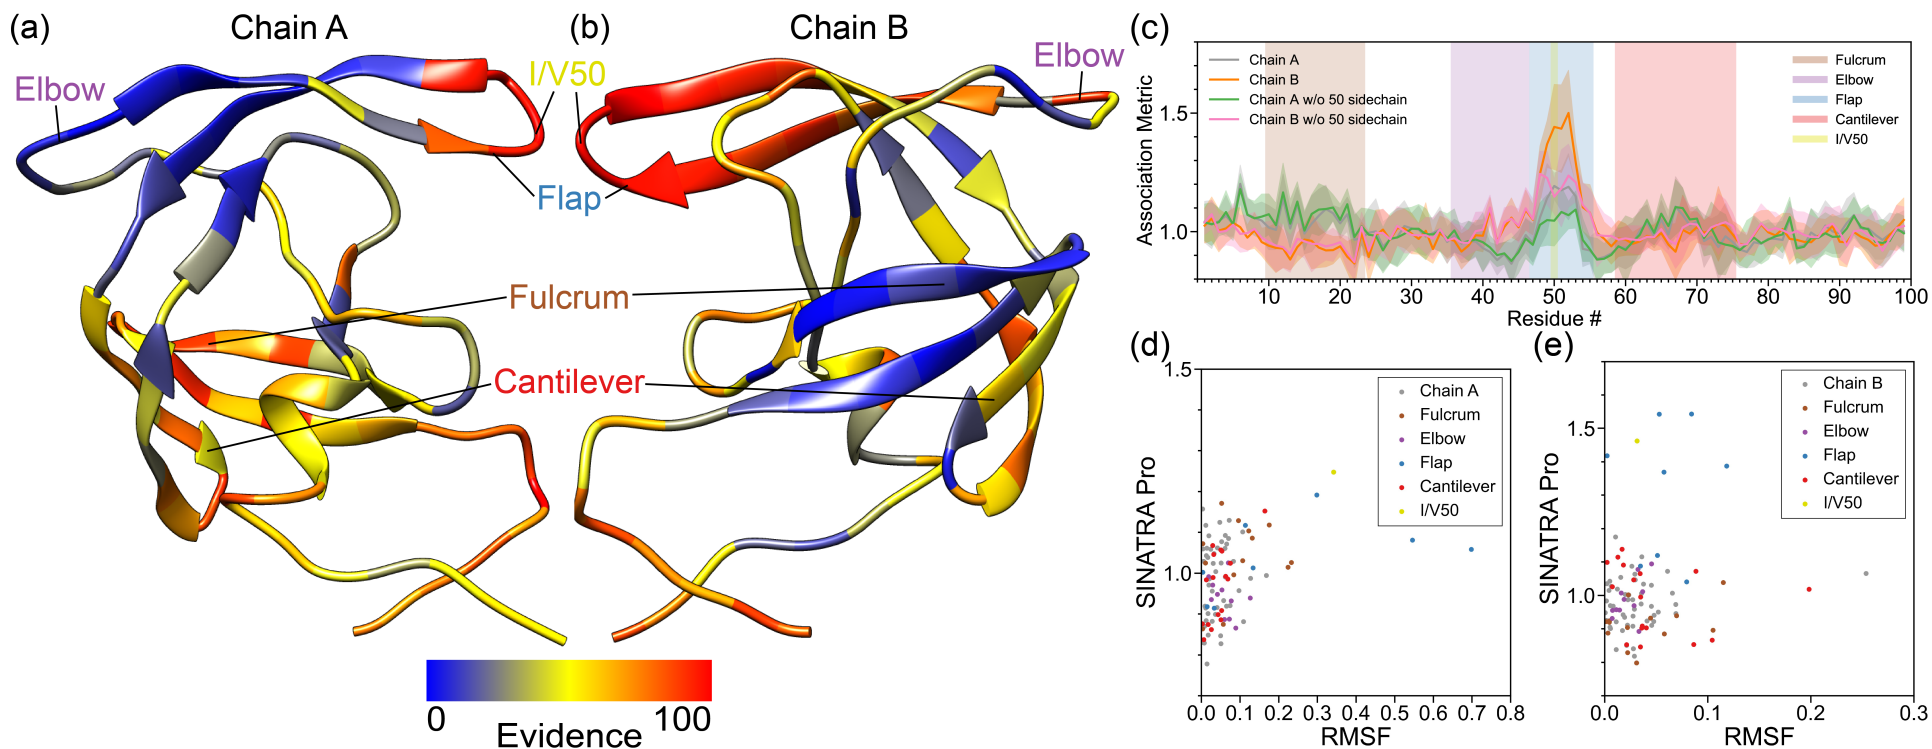

**Figure 4. Real data analyses recover structural changes in the flap region of HIV-1 protease driven by a Ile50Val mutation.** In this analysis, we compare the molecular dynamic (MD) trajectories of wild-type HIV-1 protease versus Ile50Val mutants (i.e., within residues 47-55). For both phenotypic classes, structural data are drawn from from equally spaced intervals over a 100 ns MD trajectory (e.g.,  $t_{MD} = [0, 1, 2, 3, \dots, 99] \text{ ns} + \delta$ , where  $\delta$  is a time offset parameter). Altogether, we have a final dataset of  $N = 2000$  proteins in the study: 100 ns long interval  $\times$  10 different choices  $\delta = \{0.0, 0.1, 0.2, \dots, 0.9\} \text{ ns} \times 2$  phenotypic classes (wild-type versus mutant). This figure depicts results after applying SINATRA Pro using parameters  $\{r = 6.0 \text{ \AA}, c = 20, d = 8, \theta = 0.80, l = 120\}$  chosen via a grid search. The heatmaps in panels (a) and (b) highlight residue evidence potential on a scale from [0 – 100]. A maximum of 100 represents the threshold at which the first residue of the protein is reconstructed, while 0 denotes the threshold when the last residue is reconstructed. Panel (a) shows residue-level evidence potential when applying SINATRA Pro to chain A, while panel (b) depicts results for chain B. Annotated regions of interest are color coded and correspond to the shaded residue windows in panel (c). Panel (c) shows the association metrics (and their corresponding standard errors) computed for each residue in chains A and B, with and without the 50th residue's side chain being included in the analysis (see Material and Methods). Here, the overlap shows the robustness of SINATRA Pro for identifying the same signal even when it does not have access to the full structure of the protein. The final row plots the correlation between the SINATRA Pro association metrics and the root mean square fluctuation (RMSF) for the backbone  $C_{\alpha}$  atoms in (d) chain A and (e) chain B, respectively. Highlighted are backbone  $C_{\alpha}$  atoms found in regions of the protein corresponding to the fulcrum (brown), elbow (purple), flap (blue), cantilever (red), and I/V50 (yellow) [29, 31, 32].

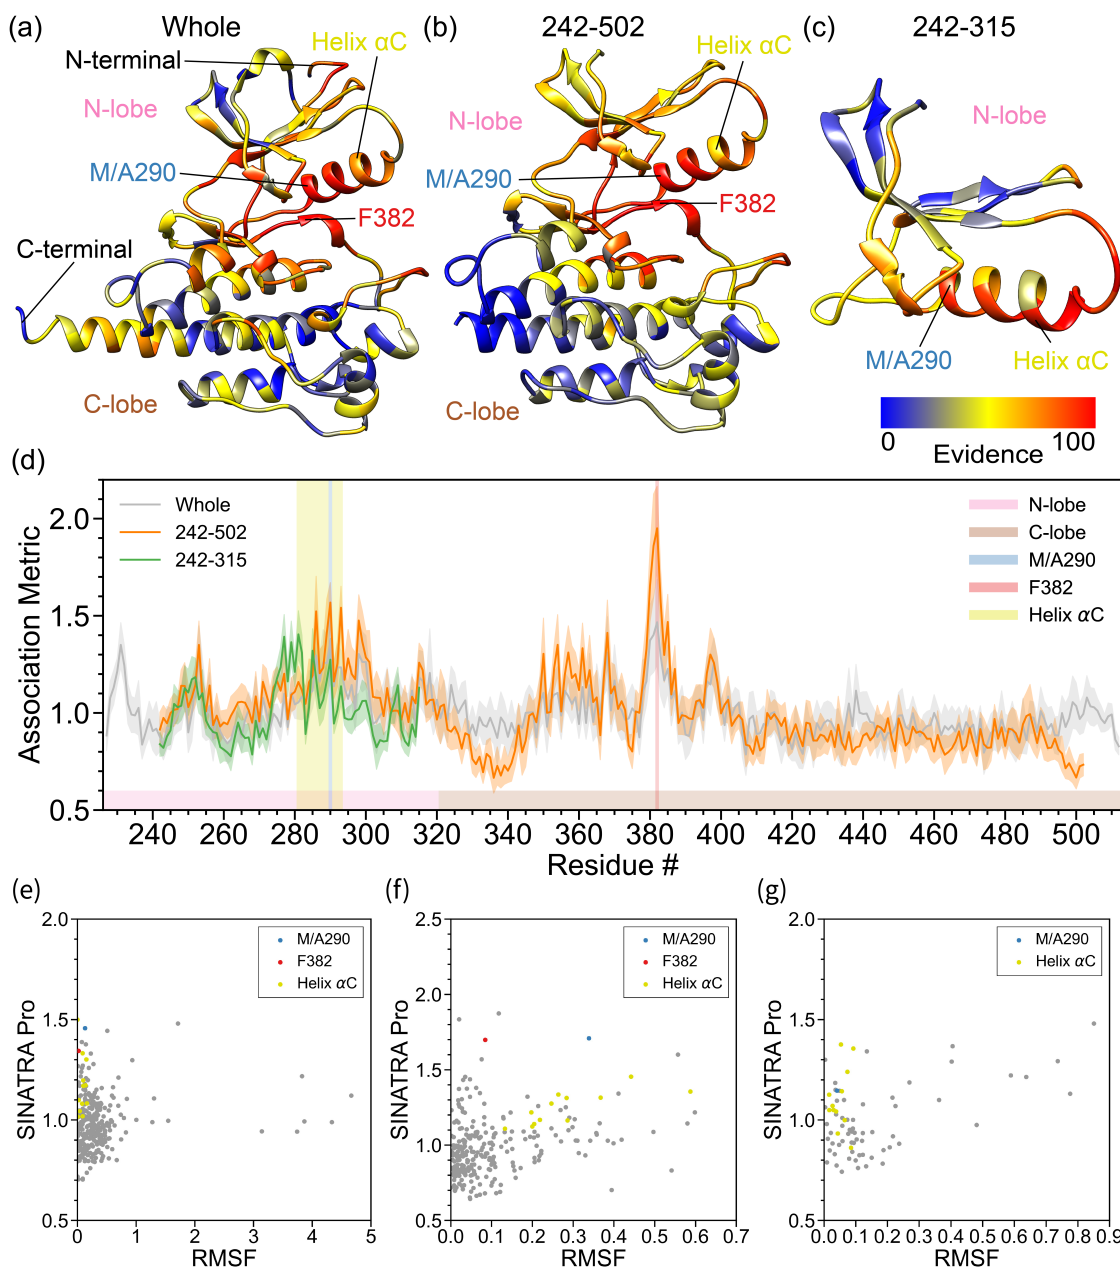

**Figure 5. Real data analyses identify enrichment in the N-terminal pocket of the Abl1 Tyrosine protein kinase due to a M290A mutation in the  $\alpha$ C helix.** In this analysis, we compare the molecular dynamic (MD) trajectories of wild-type Abl1 versus M290A mutants [2, 43, 85–87]. For both phenotypic classes, structural data are drawn from equally spaced intervals over a 150 ns MD trajectory (e.g.,  $t_{MD} = [0, 1, 2, 3, \dots, 99] \times 1.5 \text{ ns} + \delta$ , where  $\delta$  is a time offset parameter). Altogether, we have a final dataset of  $N = 3000$  proteins in the study: 150 ns long interval  $\times$  15 different choices  $\delta = \{0.0, 0.1, 0.2, \dots, 1.4\} \text{ ns} \times 2$  phenotypic classes (wild-type versus mutant). This figure depicts results after applying SINATRA Pro using parameters  $\{r = 6.0 \text{ \AA}, c = 20, d = 8, \theta = 0.80, l = 120\}$  chosen via a grid search. The heatmaps in panels (a)–(c) highlight residue evidence potential on a scale from [0–100]. A maximum of 100 represents the threshold at which the first residue of the protein is reconstructed, while 0 denotes the threshold when the last residue is reconstructed. Panel (a) shows residue-level evidence potential when applying SINATRA Pro to the whole protein, while panels (b) and (c) illustrate results when strictly applying the SINATRA Pro pipeline to atoms in residues 242–502 and 242–315, respectively. Annotated regions of interest are color coded and correspond to the shaded residue windows in panel (d). Panel (d) shows the association metrics (and their corresponding standard errors) computed for each residue within each analysis (see Material and Methods). Here, the overlap shows the robustness of SINATRA Pro to identify the same signal even when it does not have access to the full structure of the protein. The final row plots the correlation between the SINATRA Pro association metrics and the root mean square fluctuation (RMSF) for the backbone  $C_{\alpha}$  atoms in the (e) whole protein, (f) fragment 242–502, and (g) fragment 242–315.

## References

800

- 801 1. Orengo CA, Todd AE, Thornton JM. From protein structure to function. *Current Opinion in Structural Biology*. 1999;9(3):374–382. Available from: <https://www.sciencedirect.com/science/article/pii/S0959440X99800517>.  
802  
803
- 804 2. Shan Y, Seeliger MA, Eastwood MP, Frank F, Xu H, Jensen MØ, et al. A conserved protonation-dependent switch controls drug binding in the Abl kinase. *Proceedings of the National Academy of Sciences of the United States of America*. 2009;106(1):139–144. Available from: <https://www.ncbi.nlm.nih.gov/pmc/articles/PMC2610013/>.  
805  
806  
807
- 808 3. Wilson C, Agafonov RV, Hoemberger M, Kutter S, Zorba A, Halpin J, et al. Using ancient protein kinases to unravel a modern cancer drug’s mechanism. *Science*. 2015;347(6224):882–886. Available from: <https://science.sciencemag.org/content/347/6224/882>.  
809  
810
- 811 4. Hollingsworth SA, Dror RO. *Molecular Dynamics Simulation for All*. *Neuron*. 2018 Sep;99(6):1129–1143. Publisher: Elsevier. Available from: [https://www.cell.com/neuron/abstract/S0896-6273\(18\)30684-6](https://www.cell.com/neuron/abstract/S0896-6273(18)30684-6).  
812  
813
- 814 5. Grossfield A, Patrone PN, Roe DR, Schultz AJ, Siderius DW, Zuckerman DM. Best Practices for Quantification of Uncertainty and Sampling Quality in Molecular Simulations [Article v1.0]. *Living journal of computational molecular science*. 2018;1(1):5067. Available from: <https://www.ncbi.nlm.nih.gov/pmc/articles/PMC6286151/>.  
815  
816  
817
- 818 6. Michaud-Agrawal N, Denning EJ, Woolf TB, Beckstein O. MDAAnalysis: A toolkit for the analysis of molecular dynamics simulations. *Journal of Computational Chemistry*. 2011;32(10):2319–2327.  
819
- 820 7. Grant BJ, Skjaerven L, Yao XQ. The Bio3D packages for structural bioinformatics. *Protein Science: A Publication of the Protein Society*. 2021;30(1):20–30.  
821
- 822 8. Maisuradze GG, Liwo A, Scheraga HA. Principal Component Analysis for Protein Folding Dynamics. *Journal of Molecular Biology*. 2009;385(1):312–329. Available from: <https://www.sciencedirect.com/science/article/pii/S0022283608012886>.  
823  
824
- 825 9. Sittel F, Jain A, Stock G. Principal component analysis of molecular dynamics: On the use of Cartesian vs. internal coordinates. *The Journal of Chemical Physics*. 2014 Jul;141(1):014111. Publisher: American Institute of Physics. Available from: <https://aip.scitation.org/doi/10.1063/1.4885338>.  
826  
827  
828
- 829 10. Pál C, Papp B, Lercher MJ. An integrated view of protein evolution. *Nature Reviews Genetics*. 2006 May;7(5):337–348. Bandiera\_abtest: a Cg-type: Nature Research Journals Number: 5 Primary\_atype: Reviews Publisher: Nature Publishing Group. Available from: <https://www.nature.com/articles/nrg1838>.  
830  
831  
832
- 833 11. Rustamov RM, Ovsjanikov M, Azencot O, Ben-Chen M, Chazal F, Guibas L. Map-based exploration of intrinsic shape differences and variability. *ACM Trans Graph*. 2013;32(4):1–12.  
834
- 835 12. Huang R, Achlioptas P, Guibas L, Ovsjanikov M. Limit Shapes—A Tool for Understanding Shape Differences and Variability in 3D Model Collections. *Comput Graph Forum*. 2019;38(5):187–202.  
836
- 837 13. Wang B, Sudijono T, Kirveslahti H, Gao T, Boyer DM, Mukherjee S, et al. A Statistical Pipeline for Identifying Physical Features that Differentiate Classes of 3D Shapes. *Ann Appl Stat*. 2021;15(2):638–661.  
838  
839



- 840 14. Turner K, Mukherjee S, Boyer DM. Persistent homology transform for modeling shapes and  
841 surfaces. *Inf Inference*. 2014;3(4):310–344. Available from: [https://academic.oup.com/imaiai/  
842 article-abstract/3/4/310/724811?redirectedFrom=fulltext](https://academic.oup.com/imaiai/article-abstract/3/4/310/724811?redirectedFrom=fulltext).
- 843 15. Curry J, Mukherjee S, Turner K. How many directions determine a shape and other sufficiency  
844 results for two topological transforms. *arXiv*. 2019;p. 1805.09782. Available from: [https://arxiv.  
845 org/abs/1805.09782](https://arxiv.org/abs/1805.09782).
- 846 16. Ghrist R, Levanger R, Mai H. Persistent homology and Euler integral transforms. *J Appl and  
847 Comput Topology*. 2018;2(1-2):55–60. Available from: [https://link.springer.com/article/  
848 10.1007/s41468-018-0017-1](https://link.springer.com/article/10.1007/s41468-018-0017-1).
- 849 17. Crawford L, Monod A, Chen AX, Mukherjee S, Rabadán A. Predicting clinical outcomes in  
850 glioblastoma: an application of topological and functional data analysis. *J Am Stat Assoc*.  
851 2020;115(531):1139–1150.
- 852 18. Pedregosa F, Varoquaux G, Gramfort A, Michel V, Thirion B, Grisel O, et al. Scikit-learn: Machine  
853 Learning in Python. *Journal of Machine Learning Research*. 2011;12:2825–2830.
- 854 19. Xu B, Wang N, Chen T, Li M. Empirical evaluation of rectified activations in convolutional  
855 network; 2015. *ArXiv*.
- 856 20. Simonyan K, Vedaldi A, Zisserman A. Deep inside convolutional networks: Visualising image  
857 classification models and saliency maps. *arXiv preprint arXiv:13126034*. 2013;.
- 858 21. Stojanoski V, Chow DC, Hu L, Sankaran B, Gilbert HF, Prasad BVV, et al. A triple mutant in the  
859  $\Omega$ -loop of TEM-1  $\beta$ -lactamase changes the substrate profile via a large conformational change and  
860 an altered general base for catalysis. *Journal of Biological Chemistry*. 2015;290(16):10382–10394.  
861 Available from: <https://pubmed.ncbi.nlm.nih.gov/25713062>.
- 862 22. Egorov A, Rubtsova M, Grigorenko V, Uporov I, Veselovsky A. The Role of the  $\Omega$ -Loop in Regu-  
863 lation of the Catalytic Activity of TEM-Type  $\beta$ -Lactamases. *Biomolecules*. 2019;9(12). Available  
864 from: <https://www.ncbi.nlm.nih.gov/pmc/articles/PMC6995641/>.
- 865 23. Knox JR. Extended-spectrum and inhibitor-resistant TEM-type beta-lactamases: muta-  
866 tions, specificity, and three-dimensional structure. *Antimicrobial Agents and Chemother-*  
867 *apy*. 1995;39(12):2593–2601. Available from: [https://www.ncbi.nlm.nih.gov/pmc/articles/  
868 PMC162995/](https://www.ncbi.nlm.nih.gov/pmc/articles/PMC162995/).
- 869 24. Gniadkowski M. Evolution of extended-spectrum  $\beta$ -lactamases by mutation. *Clinical Microbiol-*  
870 *ogy and Infection*. 2008;14:11–32. Available from: [https://www.sciencedirect.com/science/  
871 article/pii/S1198743X14604729](https://www.sciencedirect.com/science/article/pii/S1198743X14604729).
- 872 25. Brik A, Wong CH. HIV-1 protease: mechanism and drug discovery. *Organic & Biomolecular*  
873 *Chemistry*. 2003;1(1):5–14. Publisher: Royal Society of Chemistry. Available from: [https://  
874 pubs.rsc.org/en/content/articlelanding/2003/ob/b208248a](https://pubs.rsc.org/en/content/articlelanding/2003/ob/b208248a).
- 875 26. Karacostas V, Wolffe EJ, Nagashima K, Gonda MA, Moss B. Overexpression of the HIV-1 gag-pol  
876 polyprotein results in intracellular activation of HIV-1 protease and inhibition of assembly and  
877 budding of virus-like particles. *Virology*. 1993;193(2):661–671.
- 878 27. Lv Z, Chu Y, Wang Y. HIV protease inhibitors: a review of molecular selectivity and toxicity.  
879 *HIV/AIDS (Auckland, NZ)*. 2015;7:95–104. Available from: [https://www.ncbi.nlm.nih.gov/  
880 pmc/articles/PMC4396582/](https://www.ncbi.nlm.nih.gov/pmc/articles/PMC4396582/).



- 881 28. Rhee SY, Taylor J, Fessel WJ, Kaufman D, Towner W, Troia P, et al. HIV-1 protease mutations and  
882 protease inhibitor cross-resistance. *Antimicrobial Agents and Chemotherapy*. 2010;54(10):4253–  
883 4261.
- 884 29. Sheik Amamuddy O, Bishop NT, Tastan Bishop Ö. Characterizing early drug resistance-related  
885 events using geometric ensembles from HIV protease dynamics. *Scientific Reports*. 2018;8(1):17938.  
886 Number: 1 Publisher: Nature Publishing Group. Available from: [https://www.nature.com/  
887 articles/s41598-018-36041-8](https://www.nature.com/articles/s41598-018-36041-8).
- 888 30. Palese LL. Conformations of the HIV-1 protease: A crystal structure data set analysis. *Biochimica  
889 Et Biophysica Acta Proteins and Proteomics*. 2017;1865(11 Pt A):1416–1422.
- 890 31. Hornak V, Okur A, Rizzo RC, Simmerling C. HIV-1 protease flaps spontaneously open and reclose  
891 in molecular dynamics simulations. *Proceedings of the National Academy of Sciences of the United  
892 States of America*. 2006;103(4):915–920. Available from: [http://www.pnas.org/content/103/4/  
893 915.abstract](http://www.pnas.org/content/103/4/915.abstract).
- 894 32. Liu F, Kovalevsky AY, Tie Y, Ghosh AK, Harrison RW, Weber IT. Effect of flap mutations on  
895 structure of HIV-1 protease and inhibition by saquinavir and darunavir. *Journal of Molecular  
896 Biology*. 2008;381(1):102–115. Available from: <https://pubmed.ncbi.nlm.nih.gov/18597780>.
- 897 33. Adkins JC, Faulds D. Amprenavir. *Drugs*. 1998 Jun;55(6):837–842. Available from: [https:  
898 //doi.org/10.2165/00003495-199855060-00015](https://doi.org/10.2165/00003495-199855060-00015).
- 899 34. Harvey KL, Jarocki VM, Charles IG, Djordjevic SP. The Diverse Functional Roles of Elongation  
900 Factor Tu (EF-Tu) in Microbial Pathogenesis. *Frontiers in Microbiology*. 2019;10. Publisher: Fron-  
901 tiers. Available from: [https://www.frontiersin.org/articles/10.3389/fmicb.2019.02351/  
902 full](https://www.frontiersin.org/articles/10.3389/fmicb.2019.02351/full).
- 903 35. Warias M, Grubmüller H, Bock LV. tRNA Dissociation from EF-Tu after GTP Hydrolysis: Primary  
904 Steps and Antibiotic Inhibition. *Biophysical Journal*. 2020;118(1):151–161. Available from: [https:  
905 //www.sciencedirect.com/science/article/pii/S000634951930877X](https://www.sciencedirect.com/science/article/pii/S000634951930877X).
- 906 36. Schmeing TM, Voorhees RM, Kelley AC, Gao YG, Murphy FV, Weir JR, et al. The Crystal  
907 Structure of the Ribosome Bound to EF-Tu and Aminoacyl-tRNA. *Science*. 2009;326(5953):688–  
908 694. Publisher: American Association for the Advancement of Science Section: Research Article.  
909 Available from: <https://science.sciencemag.org/content/326/5953/688>.
- 910 37. Li H, Yao XQ, Grant BJ. Comparative structural dynamic analysis of GTPases. *PLOS Com-  
911 putational Biology*. 2018;14(11):e1006364. Publisher: Public Library of Science. Available from:  
912 <https://journals.plos.org/ploscompbiol/article?id=10.1371/journal.pcbi.1006364>.
- 913 38. Hubbard SR, Till JH. Protein tyrosine kinase structure and function. *Annual Review of Biochem-  
914 istry*. 2000;69:373–398.
- 915 39. Greuber EK, Smith-Pearson P, Wang J, Pendergast AM. Role of ABL Family Kinases in Cancer:  
916 from Leukemia to Solid Tumors. *Nature Reviews Cancer*. 2013;13(8):559–571. Available from:  
917 <https://www.ncbi.nlm.nih.gov/pmc/articles/PMC3935732/>.
- 918 40. Reddy EP, Aggarwal AK. The Ins and Outs of Bcr-Abl Inhibition. *Genes & Cancer*. 2012;3(5-  
919 6):447–454. Available from: <https://www.ncbi.nlm.nih.gov/pmc/articles/PMC3513788/>.
- 920 41. Sacha T. Imatinib in Chronic Myeloid Leukemia: an Overview. *Mediterranean Journal of Hema-  
921 tology and Infectious Diseases*. 2014;6(1):e2014007. Available from: [https://www.ncbi.nlm.nih.  
922 gov/pmc/articles/PMC3894842/](https://www.ncbi.nlm.nih.gov/pmc/articles/PMC3894842/).

- 923 42. Aguilera DG, Tsimberidou AM. Dasatinib in chronic myeloid leukemia: a review. *Therapeutics*  
924 *and Clinical Risk Management*. 2009;5:281–289. Available from: [https://www.ncbi.nlm.nih.](https://www.ncbi.nlm.nih.gov/pmc/articles/PMC2697539/)  
925 [gov/pmc/articles/PMC2697539/](https://www.ncbi.nlm.nih.gov/pmc/articles/PMC2697539/).
- 926 43. Xie T, Saleh T, Rossi P, Kalodimos CG. Conformational states dynamically populated by a  
927 kinase determine its function. *Science*. 2020;370(6513):eabc2754. Publisher: American Association  
928 for the Advancement of Science Section: Research Article. Available from: [https://science.](https://science.sciencemag.org/content/early/2020/09/30/science.abc2754)  
929 [sciencemag.org/content/early/2020/09/30/science.abc2754](https://science.sciencemag.org/content/early/2020/09/30/science.abc2754).
- 930 44. Harel A, Forbes DJ. Importin Beta: Conducting a Much Larger Cellular Symphony. *Molec-*  
931 *ular Cell*. 2004;16(3):319–330. Publisher: Elsevier. Available from: [https://www.cell.com/](https://www.cell.com/molecular-cell/abstract/S1097-2765(04)00647-1)  
932 [molecular-cell/abstract/S1097-2765\(04\)00647-1](https://www.cell.com/molecular-cell/abstract/S1097-2765(04)00647-1).
- 933 45. Zachariae U, Grubmüller H. Importin- $\beta$ : Structural and Dynamic Determinants of a Molecu-  
934 lar Spring. *Structure*. 2008;16(6):906–915. Available from: [https://www.sciencedirect.com/](https://www.sciencedirect.com/science/article/pii/S0969212608001445)  
935 [science/article/pii/S0969212608001445](https://www.sciencedirect.com/science/article/pii/S0969212608001445).
- 936 46. Cingolani G, Petosa C, Weis K, Müller CW. Structure of importin- $\beta$  bound to the IBB domain of  
937 importin- $\alpha$ . *Nature*. 1999;399(6733):221–229. Number: 6733 Publisher: Nature Publishing Group.  
938 Available from: <https://www.nature.com/articles/20367>.
- 939 47. Halder K, Dölker N, Van Q, Gregor I, Dickmanns A, Baade I, et al. MD Simulations and  
940 FRET Reveal an Environment-Sensitive Conformational Plasticity of Importin- $\beta$ . *Biophysical*  
941 *Journal*. 2015;109(2):277–286. Available from: [https://www.ncbi.nlm.nih.gov/pmc/articles/](https://www.ncbi.nlm.nih.gov/pmc/articles/PMC4621615/)  
942 [PMC4621615/](https://www.ncbi.nlm.nih.gov/pmc/articles/PMC4621615/).
- 943 48. Jiang Q, Kurtek S, Needham T. The Weighted Euler Curve Transform for Shape and Image  
944 Analysis. *CoRR*. 2020;abs/2004.11128. Available from: <https://arxiv.org/abs/2004.11128>.
- 945 49. SC '06: Proceedings of the 2006 ACM/IEEE Conference on Supercomputing. New York, NY, USA:  
946 Association for Computing Machinery; 2006.
- 947 50. Harder E, Damm W, Maple J, Wu C, Reboul M, Xiang JY, et al. OPLS3: A Force Field Providing  
948 Broad Coverage of Drug-like Small Molecules and Proteins. *Journal of Chemical Theory and*  
949 *Computation*. 2016;12(1):281–296. Publisher: American Chemical Society. Available from: [https:](https://doi.org/10.1021/acs.jctc.5b00864)  
950 [//doi.org/10.1021/acs.jctc.5b00864](https://doi.org/10.1021/acs.jctc.5b00864).
- 951 51. Mark P, Nilsson L. Structure and Dynamics of the TIP3P, SPC, and SPC/E Water Models at  
952 298 K. *The Journal of Physical Chemistry A*. 2001;105(43):9954–9960. Available from: [https:](https://doi.org/10.1021/jp003020w)  
953 [//doi.org/10.1021/jp003020w](https://doi.org/10.1021/jp003020w).
- 954 52. Van Der Spoel D, Lindahl E, Hess B, Groenhof G, Mark AE, Berendsen HJC. GROMACS: Fast,  
955 flexible, and free. *Journal of Computational Chemistry*. 2005;26(16):1701–1718.
- 956 53. Maier JA, Martinez C, Kasavajhala K, Wickstrom L, Hauser KE, Simmerling C. ff14SB: Improving  
957 the Accuracy of Protein Side Chain and Backbone Parameters from ff99SB. *Journal of Chemical*  
958 *Theory and Computation*. 2015 Aug;11(8):3696–3713. Publisher: American Chemical Society.  
959 Available from: <https://doi.org/10.1021/acs.jctc.5b00255>.
- 960 54. Hess B, Bekker H, Berendsen HJC, Fraaije JGEM. LINCS: A linear constraint solver for molecular  
961 simulations. *Journal of Computational Chemistry*. 1997;18(12):1463–1472.
- 962 55. Humphrey W, Dalke A, Schulten K. VMD – Visual Molecular Dynamics. *Journal of Molecular*  
963 *Graphics*. 1996;14:33–38.

- 964 56. Theobald DL. Rapid calculation of RMSDs using a quaternion-based characteristic polynomial.  
965 *Acta Crystallographica Section A*. 2005;61(4):478–480.
- 966 57. Liu P, Agrafiotis DK, Theobald DL. Fast determination of the optimal rotational matrix  
967 for macromolecular superpositions. *Journal of Computational Chemistry*. 2010;31(7):1561–1563.  
968 PMC2958452[pmcid].
- 969 58. Gowers RJ, Linke M, Barnoud J, Reddy TJE, Melo MN, Seyler SL, et al. MDAnalysis: A Python  
970 Package for the Rapid Analysis of Molecular Dynamics Simulations. In: *Proceedings of the 15th*  
971 *Python in Science Conference*; 2016. p. 98–105.
- 972 59. Jiang Q, Kurtke S, Needham T. The Weighted Euler Curve Transform for Shape and Image Anal-  
973 ysis. In: *Proceedings of the IEEE/CVF Conference on Computer Vision and Pattern Recognition*  
974 *(CVPR) Workshops*; 2020. .
- 975 60. Moon C, Li Q, Xiao G. Predicting survival outcomes using topological features of tumor pathology  
976 images. *arXiv*. 2020;p. 2012.12102.
- 977 61. Fasy BT, Micka S, Millman DL, Schenfisch A, Williams L. Challenges in reconstructing shapes  
978 from Euler characteristic curves. *arXiv*. 2018;p. 1811.11337.
- 979 62. Oudot S, Solomon E. Inverse Problems in Topological Persistence. In: Baas NA, Carlsson GE,  
980 Quick G, Szymik M, Thaule M, editors. *Topological Data Analysis*. Cham: Springer International  
981 Publishing; 2020. p. 405–433.
- 982 63. Neal RM. Monte Carlo implementation of Gaussian process models for Bayesian regression and-  
983 Monte Carlo implementation of Gaussian process models for Bayesian regression and classification.  
984 Dept. of Statistics, University of Toronto; 1997. 9702.
- 985 64. Neal RM. Regression and classification using Gaussian process priors. *Bayesian Anal*. 1998;6:475.
- 986 65. Williams CKI, Barber D. Bayesian classification with Gaussian processes. *IEEE Trans Pattern Anal*  
987 *Mach Intell*. 1998;20(12):1342–1351. Available from: [https://ieeexplore.ieee.org/document/](https://ieeexplore.ieee.org/document/735807/)  
988 [735807/](https://ieeexplore.ieee.org/document/735807/).
- 989 66. Rasmussen CE, Williams CKI. *Gaussian processes for machine learning*. Cambridge, MA: MIT  
990 Press; 2006.
- 991 67. Nickisch H, Rasmussen CE. Approximations for binary Gaussian process classification. *J Mach*  
992 *Learn Res*. 2008;9(10):2035–2078.
- 993 68. Schölkopf B, Herbrich R, Smola AJ. A generalized representer theorem. In: *Proceedings of the*  
994 *14th Annual Conference on Computational Learning Theory and and 5th European Conference on*  
995 *Computational Learning Theory*. London, UK, UK: Springer-Verlag; 2001. p. 416–426. Available  
996 from: <http://dl.acm.org/citation.cfm?id=648300.755324>.
- 997 69. Pillai NS, Wu Q, Liang F, Mukherjee S, Wolpert R. Characterizing the function space for Bayesian  
998 kernel models. *J Mach Learn Res*. 2007;8:1769–1797.
- 999 70. Zhang Z, Dai G, Jordan MI. Bayesian generalized kernel mixed models. *J Mach Learn Res*.  
1000 2011;12:111–139.
- 1001 71. Jiang Y, Reif JC. Modeling epistasis in genomic selection. *Genetics*. 2015;201:759–768.

- 1002 72. Crawford L, Wood KC, Zhou X, Mukherjee S. Bayesian approximate kernel regression with variable  
1003 selection. *J Am Stat Assoc.* 2018;113(524):1710–1721. Available from: [https://doi.org/10.](https://doi.org/10.1080/01621459.2017.1361830)  
1004 [1080/01621459.2017.1361830](https://doi.org/10.1080/01621459.2017.1361830).
- 1005 73. Crawford L, Flaxman SR, Runcie DE, West M. Variable prioritization in nonlinear black box  
1006 methods: a genetic association case study. *Ann Appl Stat.* 2019;13(2):958–989. Available from:  
1007 <https://projecteuclid.org/euclid.aoas/1560758434>.
- 1008 74. Chaudhuri A, Kakde D, Sadek C, Gonzalez L, Kong S. The mean and median criteria for kernel  
1009 bandwidth selection for support vector data description. *Data Mining Workshops (ICDMW), 2017*  
1010 *IEEE International Conference on.* 2017;p. 842–849. Available from: [https://ieeexplore.ieee.](https://ieeexplore.ieee.org/abstract/document/8215749/)  
1011 [org/abstract/document/8215749/](https://ieeexplore.ieee.org/abstract/document/8215749/).
- 1012 75. Murray I, Prescott Adams R, MacKay DJ. Elliptical slice sampling. *Proceedings of the Thirteenth*  
1013 *International Conference on Artificial Intelligence and Statistics.* 2010;p. 541–548.
- 1014 76. Singleton KR, Crawford L, Tsui E, Manchester HE, Maertens O, Liu X, et al. Melanoma thera-  
1015 peutic strategies that select against resistance by exploiting MYC-driven evolutionary convergence.  
1016 *Cell Rep.* 2017;21(10):2796–2812.
- 1017 77. Hager WW. Updating the inverse of a matrix. *SIAM Review.* 1989;31(2):221–239.
- 1018 78. Cover T, Hart P. Nearest neighbor pattern classification. *IEEE Trans Inf Theor.* 2006;13(1):21–27.  
1019 Available from: <https://doi.org/10.1109/TIT.1967.1053964>.
- 1020 79. Sellke T, Bayarri MJ, Berger JO. Calibration of p-values for testing precise null hypotheses. *Am*  
1021 *Stat.* 2001;55(1):62–71.
- 1022 80. Gopalan G, Bornn L. FastGP: An R package for Gaussian processes. *arXiv.* 2015;p. 1507.06055.  
1023 Available from: <https://arxiv.org/abs/1507.06055>.
- 1024 81. Pettersen EF, Goddard TD, Huang CC, Couch GS, Greenblatt DM, Meng EC, et al. UCSF  
1025 Chimera—a visualization system for exploratory research and analysis. *J Comput Chem.*  
1026 2004;25(13):1605–1612.
- 1027 82. Belongie S. Rodrigues’ rotation formula. From MathWorld—A Wolfram Web Resource, created by  
1028 Eric W Weisstein <http://mathworld.wolfram.com/RodriguesRotationFormula.html>. 1999;.
- 1029 83. Wallin G, Kamerlin SCL, Åqvist J. Energetics of activation of GTP hydrolysis on the ribosome. *Nat-*  
1030 *ure Communications.* 2013;4(1):1733. Available from: <https://doi.org/10.1038/ncomms2741>.
- 1031 84. Mondal D, Warshel A. EF-Tu and EF-G are activated by allosteric effects. *Proceedings of the*  
1032 *National Academy of Sciences of the United States of America.* 2018;115(13):3386. Available from:  
1033 <http://www.pnas.org/content/115/13/3386.abstract>.
- 1034 85. Kornev AP, Haste NM, Taylor SS, Eyck LFT. Surface comparison of active and inactive protein  
1035 kinases identifies a conserved activation mechanism. *Proc Natl Acad Sci U S A.* 2006;103(47):17783–  
1036 17788.
- 1037 86. Azam M, Seeliger MA, Gray NS, Kuriyan J, Daley GQ. Activation of tyrosine kinases by mutation  
1038 of the gatekeeper threonine. *Nat Struct Mol Biol.* 2008;15(10):1109–1118.
- 1039 87. Kornev AP, Taylor SS. Defining the conserved internal architecture of a protein kinase. *Biochim*  
1040 *Biophys Acta.* 2010;1804(3):440–444.

- 1041 88. Berman HM, Westbrook J, Feng Z, Gilliland G, Bhat TN, Weissig H, et al. The Protein Data  
1042 Bank. *Nucleic Acids Research*. 2000;28(1):235–242. Available from: [https://doi.org/10.1093/  
1043 nar/28.1.235](https://doi.org/10.1093/nar/28.1.235).
